# Supplementary material
Source: publisher site journal article supplement (https://www.spandidos-publications.com/7587/downloadSupplementary)
Supplement: Supplementary file 1 [file downloadSupplementary]

## Sheet: Sheet1
Table SII. Downloaded data from The Cancer Genome Atlas.
Order	STUDY_ID	SAMPLE_ID	Diagnosis Age	Sex	Histology	DPYD	TYMP	TYMS	UMPS	ERCC1	EGFR	EGFR MUT	Race Category
31	luad_tcga_pan_can_atlas_2018	TCGA-35-4123-01	38	Male	Ad	0.5871	0.672	1.0449	0.6297	1.5424	0.1431	WT	White
504	luad_tcga_pan_can_atlas_2018	TCGA-49-AARO-01	39	Female	Ad	-0.2405	1.1657	-0.1974	-0.7112	0.3699	0.3211	WT	Black or African American
1213	lusc_tcga_pan_can_atlas_2018	TCGA-60-2716-01	39	Male	SQ	-2.5615	-2.3082	-0.6385	-0.5839	0.5805	-0.2826	WT
1450	lusc_tcga_pan_can_atlas_2018	TCGA-33-4566-01	40	Male	SQ	0.8781	0.1938	1.6538	0.2254	0.1798	-0.3999	MUT	White
131	luad_tcga_pan_can_atlas_2018	TCGA-53-7624-01	40	Female	Ad	-2.0649	0.5435	1.0278	0.5931	0.5336	2.9267	WT	White
402	luad_tcga_pan_can_atlas_2018	TCGA-L9-A5IP-01	40	Female	Ad	0.0071	1.7767	-0.2813	0.2724	0.6517	0.7563	WT	Black or African American
196	luad_tcga_pan_can_atlas_2018	TCGA-55-8512-01	41	Male	Ad	-0.4764	-0.4124	-1.9858	-1.0283	0.6186	0.1372	WT	White
103	luad_tcga_pan_can_atlas_2018	TCGA-49-AARQ-01	41	Female	Ad	0.762	1.1152	0.621	0.3699	0.4545	-0.2773	WT	Black or African American
15	luad_tcga_pan_can_atlas_2018	TCGA-05-4420-01	41	Male	Ad	0.1856	0.1441	1.436	0.631	-0.4719	-0.4986	WT
268	luad_tcga_pan_can_atlas_2018	TCGA-73-A9RS-01	41	Male	Ad	-1.216	0.9269	0.4444	0.3323	1.788	-0.6841	WT	Black or African American
1204	lusc_tcga_pan_can_atlas_2018	TCGA-60-2697-01	41	Male	SQ	1.374	-0.3449	-1.034	-1.2705	-0.381	-0.7216	WT	White
366	luad_tcga_pan_can_atlas_2018	TCGA-95-7948-01	42	Female	Ad	-1.1419	-1.4324	-0.2318	0.1219	0.1681	0.7749	WT	White
36	luad_tcga_pan_can_atlas_2018	TCGA-38-4632-01	42	Male	Ad	0.3496	0.9031	1.967	-1.025	1.2366	0.0201	WT	Black or African American
326	luad_tcga_pan_can_atlas_2018	TCGA-86-8076-01	42	Male	Ad	0.5165	1.416	-1.0386	-0.2824	0.0756	-0.125	WT	White
246	luad_tcga_pan_can_atlas_2018	TCGA-69-7973-01	42	Female	Ad	-0.8965	0.1792	0.7101	-2.5127	0.7737	-0.1783	WT	White
109	luad_tcga_pan_can_atlas_2018	TCGA-50-5051-01	42	Female	Ad	-1.4671	-0.6554	-0.3851	-0.0411	-0.5391	-1.9487	WT	White
45	luad_tcga_pan_can_atlas_2018	TCGA-44-2666-01	43	Male	Ad	0.8821	-0.417	0.6023	0.5994	0.8887	0.0231	WT	White
1108	lusc_tcga_pan_can_atlas_2018	TCGA-39-5016-01	44	Male	SQ	0.1621	0.92	-0.4992	-0.0708	1.2905	0.2478	WT	White
1438	lusc_tcga_pan_can_atlas_2018	TCGA-O2-A52Q-01	44	Female	SQ	1.185	0.4386	0.0898	-1.5062	-0.2546	-0.9452	WT	White
330	luad_tcga_pan_can_atlas_2018	TCGA-86-8358-01	44	Male	Ad	-1.333	-1.9616	1.1839	1.0091	-1.3971	-2.8038	WT	White
495	luad_tcga_pan_can_atlas_2018	TCGA-97-A4M6-01	45	Female	Ad	0.1073	0.4983	-0.4821	-1.4447	-0.8718	0.0513	MUT	White
445	luad_tcga_pan_can_atlas_2018	TCGA-49-4490-01	45	Female	Ad	0.109	-0.8721	-1.2563	0.2516	-0.0807	0.002	MUT	White
264	luad_tcga_pan_can_atlas_2018	TCGA-73-4676-01	45	Male	Ad	-0.1642	-0.2192	0.2178	1.3695	0.3444	0.4341	WT	White
1382	lusc_tcga_pan_can_atlas_2018	TCGA-92-7340-01	45	Female	SQ	0.7533	0.0883	0.2545	-0.155	-0.0347	-0.3779	WT	White
298	luad_tcga_pan_can_atlas_2018	TCGA-78-7535-01	45	Male	Ad	1.1395	-0.0884	-0.1201	-1.8087	-0.0135	-0.4786	WT	White
1415	lusc_tcga_pan_can_atlas_2018	TCGA-L3-A524-01	45	Female	SQ	-1.5324	-1.1992	-0.1796	-0.4023	-0.411	-0.742	WT	White
1338	lusc_tcga_pan_can_atlas_2018	TCGA-85-7950-01	46	Male	SQ	-0.0237	0.6172	-0.6273	0.0813	-0.3221	1.0331	WT	White
328	luad_tcga_pan_can_atlas_2018	TCGA-86-8279-01	46	Male	Ad	0.2988	-1.1681	-0.4346	-0.3272	-1.1878	0.496	WT	White
94	luad_tcga_pan_can_atlas_2018	TCGA-49-6767-01	46	Female	Ad	-1.3885	-0.622	-0.4708	1.0631	-0.7803	0.2091	WT	White
1370	lusc_tcga_pan_can_atlas_2018	TCGA-85-A512-01	46	Male	SQ	-1.2209	-0.1495	0.4215	0.3397	-0.3448	-1.0657	WT	White
1458	lusc_tcga_pan_can_atlas_2018	TCGA-70-6722-01	47	Male	SQ	1.1826	0.0704	0.3514	-0.5402	0.4983	2.7457	MUT	Asian
1460	lusc_tcga_pan_can_atlas_2018	TCGA-85-A50M-01	47	Male	SQ	1.6546	0.4837	-0.2411	-2.688	-0.2859	1.3267	MUT	Asian
10	luad_tcga_pan_can_atlas_2018	TCGA-05-4398-01	47	Female	Ad	0.1967	1.6909	0.0278	0.9757	0.2055	1.238	WT
1125	lusc_tcga_pan_can_atlas_2018	TCGA-43-2581-01	47	Female	SQ	1.241	0.663	0.1605	-1.2743	-0.3084	0.3496	WT	White
1219	lusc_tcga_pan_can_atlas_2018	TCGA-60-2724-01	47	Male	SQ	0.0938	0.2608	0.004	0.1071	-0.4075	0.0002	WT	White
69	luad_tcga_pan_can_atlas_2018	TCGA-44-7670-01	47	Female	Ad	-1.6142	-1.0269	0.661	1.593	2.0573	-0.4491	WT	White
113	luad_tcga_pan_can_atlas_2018	TCGA-50-5930-01	47	Male	Ad	-0.5571	-0.3371	-0.1442	-0.4712	0.2972	-0.7126	WT	White
399	luad_tcga_pan_can_atlas_2018	TCGA-L4-A4E5-01	48	Female	Ad	0.0831	0.0787	2.0435	0.495	-0.9226	1.3055	WT	White
1241	lusc_tcga_pan_can_atlas_2018	TCGA-63-A5MU-01	48	Male	SQ	-0.58	0.0947	0.4648	0.6975	0.4759	0.6951	WT
256	luad_tcga_pan_can_atlas_2018	TCGA-71-6725-01	48	Female	Ad	1.2676	-1.2802	-1.1379	-1.0641	-1.4612	0.554	WT	Asian
1333	lusc_tcga_pan_can_atlas_2018	TCGA-85-7698-01	48	Male	SQ	-0.5159	0.1556	-0.4357	0.1409	-0.5382	0.2428	WT	White
339	luad_tcga_pan_can_atlas_2018	TCGA-86-A4D0-01	48	Male	Ad	-2.0723	-1.7082	1.2918	0.7102	-1.535	-1.7385	WT	White
1332	lusc_tcga_pan_can_atlas_2018	TCGA-85-7697-01	49	Male	SQ	0.3265	0.3937	-0.7785	0.6634	-1.3115	0.5553	WT	White
167	luad_tcga_pan_can_atlas_2018	TCGA-55-7816-01	49	Female	Ad	1.6459	-0.6913	-1.3206	-0.9604	-0.2584	0.5283	WT	White
124	luad_tcga_pan_can_atlas_2018	TCGA-50-6593-01	49	Female	Ad	0.8609	0.1284	0.6596	-1.0765	-0.5261	0.4196	WT	White
1356	lusc_tcga_pan_can_atlas_2018	TCGA-85-8582-01	49	Male	SQ	0.3778	-0.0154	-0.4464	-1.0147	-0.7643	0.4036	WT	White
361	luad_tcga_pan_can_atlas_2018	TCGA-93-A4JQ-01	49	Male	Ad	-0.1979	0.6193	0.8147	-0.279	0.2448	0.1417	WT	White
431	luad_tcga_pan_can_atlas_2018	TCGA-NJ-A7XG-01	49	Male	Ad	0.8148	0.5688	-1.0202	-1.0049	-1.0039	-0.5203	WT	Black or African American
67	luad_tcga_pan_can_atlas_2018	TCGA-44-7667-01	49	Female	Ad	-1.1525	0.0611	2.0559	0.1711	0.4752	-0.6376	WT	White
62	luad_tcga_pan_can_atlas_2018	TCGA-44-6779-01	50	Female	Ad	1.6958	1.494	-0.1705	-1.4522	-1.6533	1.3794	WT	White
1336	lusc_tcga_pan_can_atlas_2018	TCGA-85-7843-01	50	Male	SQ	0.2055	-0.7813	0.9146	-0.1491	-0.5121	-0.0297	WT	White
170	luad_tcga_pan_can_atlas_2018	TCGA-55-7910-01	50	Female	Ad	-1.7478	-1.0349	0.5843	0.2283	-0.3928	-0.921	WT	Black or African American
391	luad_tcga_pan_can_atlas_2018	TCGA-99-8028-01	50	Female	Ad	0.5464	1.4751	-0.2599	-1.1052	0.3795	-0.9844	WT	Black or African American
423	luad_tcga_pan_can_atlas_2018	TCGA-NJ-A4YF-01	50	Female	Ad	-2.2118	-0.5047	-0.8001	0.7904	0.5288	-1.4384	WT	Black or African American
337	luad_tcga_pan_can_atlas_2018	TCGA-86-8674-01	50	Male	Ad	-1.9346	2.3946	-1.2569	0.0835	0.4132	-1.5923	WT	White
53	luad_tcga_pan_can_atlas_2018	TCGA-44-5644-01	51	Female	Ad	-2.4406	-1.169	0.2904	0.2666	-1.8363	1.1916	WT	White
46	luad_tcga_pan_can_atlas_2018	TCGA-44-2668-01	51	Male	Ad	1.142	1.0918	0.6006	0.8053	-1.1284	1.0802	WT	White
13	luad_tcga_pan_can_atlas_2018	TCGA-05-4417-01	51	Female	Ad	0.3129	0.7108	-0.2652	-0.2579	-0.0567	0.1862	WT
1096	lusc_tcga_pan_can_atlas_2018	TCGA-37-3783-01	51	Male	SQ	1.5625	1.2317	0.8836	1.3148	-0.2504	-0.7029	WT	White
86	luad_tcga_pan_can_atlas_2018	TCGA-49-4510-01	51	Female	Ad	-1.3597	-0.005	-2.6144	-0.1587	1.3771	-0.807	WT	Black or African American
99	luad_tcga_pan_can_atlas_2018	TCGA-49-AAR4-01	51	Male	Ad	0.2627	1.2897	0.4622	-0.4427	0.925	-0.8502	WT	Black or African American
133	luad_tcga_pan_can_atlas_2018	TCGA-53-7813-01	51	Female	Ad	-1.0175	-1.0531	0.0668	1.3228	-0.6171	-0.8782	WT	White
101	luad_tcga_pan_can_atlas_2018	TCGA-49-AARE-01	51	Female	Ad	-2.1455	0.8573	-0.3717	0.9958	1.6127	-2.8053	WT	Black or African American
181	luad_tcga_pan_can_atlas_2018	TCGA-55-8094-01	51	Male	Ad	-2.0687	-1.4222	0.9006	-0.647	-1.3342	-4.1026	WT	White
494	luad_tcga_pan_can_atlas_2018	TCGA-97-A4M1-01	52	Female	Ad	0.671	-0.7112	-1.8901	-1.1633	0.1428	0.2201	MUT	White
314	luad_tcga_pan_can_atlas_2018	TCGA-86-6562-01	52	Male	Ad	0.5344	-0.406	-0.0689	-0.8699	-0.2618	0.7729	WT	White
346	luad_tcga_pan_can_atlas_2018	TCGA-91-6836-01	52	Female	Ad	-0.5583	-0.6793	0.7302	1.2356	0.6502	0.6175	WT	White
1384	lusc_tcga_pan_can_atlas_2018	TCGA-92-8063-01	52	Male	SQ	1.1576	0.2088	0.6283	0.5809	1.541	0.5238	WT	White
260	luad_tcga_pan_can_atlas_2018	TCGA-73-4666-01	52	Female	Ad	0.8207	0.4933	0.749	1.9953	-0.9512	0.4606	WT	White
241	luad_tcga_pan_can_atlas_2018	TCGA-67-6215-01	52	Female	Ad	2.0381	-0.0257	0.1589	-0.3732	-0.5678	0.4501	WT	White
1343	lusc_tcga_pan_can_atlas_2018	TCGA-85-8071-01	52	Male	SQ	-0.0438	-0.0354	0.0082	-0.6355	-2.7847	0.3741	WT	White
1126	lusc_tcga_pan_can_atlas_2018	TCGA-43-3394-01	52	Male	SQ	-0.3885	-0.4272	-0.9715	1.0969	0.3894	0.3684	WT	Black or African American
1355	lusc_tcga_pan_can_atlas_2018	TCGA-85-8580-01	52	Female	SQ	-0.5467	-0.4071	0.4843	2.0106	-0.9333	0.155	WT	White
281	luad_tcga_pan_can_atlas_2018	TCGA-78-7145-01	52	Female	Ad	1.3438	-1.4522	0.2645	0.6137	-0.6828	0.1529	WT	White
71	luad_tcga_pan_can_atlas_2018	TCGA-44-7672-01	52	Female	Ad	0.0628	0.7639	1.0413	-1.4127	-0.2638	0.123	WT	White
1202	lusc_tcga_pan_can_atlas_2018	TCGA-58-A46N-01	52	Male	SQ	-3.3942	-1.6232	2.0678	1.3721	0.6564	-0.0725	WT	White
1005	lusc_tcga_pan_can_atlas_2018	TCGA-18-3412-01	52	Male	SQ	-0.9595	-0.4126	1.2267	-1.4438	0.4279	-0.6222	WT	White
331	luad_tcga_pan_can_atlas_2018	TCGA-86-8359-01	52	Male	Ad	-0.1748	0.506	-0.7673	-0.4337	-0.9425	-0.9092	WT	White
105	luad_tcga_pan_can_atlas_2018	TCGA-4B-A93V-01	52	Female	Ad	-2.1944	0.4549	0.4548	-0.4253	1.2709	-1.0534	WT	Black or African American
426	luad_tcga_pan_can_atlas_2018	TCGA-NJ-A4YP-01	52	Male	Ad	-0.3053	1.0758	-0.0482	0.2084	-0.259	-1.3377	WT	White
142	luad_tcga_pan_can_atlas_2018	TCGA-55-6969-01	52	Male	Ad	-0.5264	0.3483	0.2667	0.4743	1.2678	-1.3872	WT	White
1098	lusc_tcga_pan_can_atlas_2018	TCGA-37-4129-01	52	Female	SQ	-2.2053	-4.2909	-5.0042	-2.2181	-0.7202	-2.2545	WT	White
455	luad_tcga_pan_can_atlas_2018	TCGA-55-6981-01	53	Female	Ad	0.9322	-1.1592	-0.5009	0.3912	-0.5536	2.2268	MUT	White
499	luad_tcga_pan_can_atlas_2018	TCGA-MP-A4SW-01	53	Male	Ad	-0.0237	1.2342	0.0408	-0.6469	-1.0528	0.9991	MUT	White
1485	lusc_tcga_pan_can_atlas_2018	TCGA-85-8354-01	53	Male	SQ	-1.9878	-1.3635	1.0952	-0.3088	0.0302	1.3688	WT	White
309	luad_tcga_pan_can_atlas_2018	TCGA-78-8662-01	53	Female	Ad	-2.9713	-2.1831	2.1638	-0.5042	1.2958	1.3481	WT
1105	lusc_tcga_pan_can_atlas_2018	TCGA-37-A5EL-01	53	Male	SQ	-0.073	-0.2619	-0.2057	0.0676	-2.6917	1.1571	WT	White
1380	lusc_tcga_pan_can_atlas_2018	TCGA-90-A4EE-01	53	Male	SQ	0.3938	1.4496	0.5335	-0.0881	0.0229	0.046	WT	White
1422	lusc_tcga_pan_can_atlas_2018	TCGA-NC-A5HH-01	53	Male	SQ	-2.0375	-1.9221	1.4346	0.0599	-0.0408	-0.0177	WT	White
52	luad_tcga_pan_can_atlas_2018	TCGA-44-5643-01	53	Male	Ad	-2.4013	-0.4121	1.1894	3.557	0.1058	-0.0306	WT	Black or African American
1341	lusc_tcga_pan_can_atlas_2018	TCGA-85-8052-01	53	Male	SQ	-0.4362	-0.2211	-0.5825	1.3128	0.1456	-0.2254	WT	White
192	luad_tcga_pan_can_atlas_2018	TCGA-55-8507-01	53	Male	Ad	-0.8009	-0.2946	-0.3159	0.7217	-0.0555	-0.9008	WT	White
501	luad_tcga_pan_can_atlas_2018	TCGA-MP-A4T9-01	54	Female	Ad	0.2663	-0.4044	-0.3316	0.05	0.1566	1.5983	MUT	White
482	luad_tcga_pan_can_atlas_2018	TCGA-86-8280-01	54	Female	Ad	0.9627	0.2469	-1.1133	-0.869	-0.1863	0.7343	MUT	White
487	luad_tcga_pan_can_atlas_2018	TCGA-95-7039-01	54	Female	Ad	-0.3596	-0.0144	0.5823	-0.057	-1.4573	0.3999	MUT	White
209	luad_tcga_pan_can_atlas_2018	TCGA-55-A493-01	54	Female	Ad	0.1194	0.7821	0.5839	0.7565	-0.3709	1.2086	WT	White
219	luad_tcga_pan_can_atlas_2018	TCGA-62-A46R-01	54	Female	Ad	0.3148	0.4731	0.2293	-1.2822	-1.4569	1.1328	WT	White
72	luad_tcga_pan_can_atlas_2018	TCGA-44-8117-01	54	Female	Ad	0.5817	-0.4232	0.2554	-0.9916	-1.0457	1.107	WT	White
247	luad_tcga_pan_can_atlas_2018	TCGA-69-7974-01	54	Female	Ad	1.1002	0.5392	0.4146	-1.8461	0.8861	0.3247	WT	White
160	luad_tcga_pan_can_atlas_2018	TCGA-55-7576-01	54	Male	Ad	1.0711	-0.7436	0.1848	-0.1299	0.131	0.3035	WT	Black or African American
190	luad_tcga_pan_can_atlas_2018	TCGA-55-8302-01	54	Male	Ad	-0.2554	1.2602	0.8588	-0.3375	-0.3299	-0.2483	WT	White
1233	lusc_tcga_pan_can_atlas_2018	TCGA-63-A5MJ-01	54	Male	SQ	-1.1784	1.4743	-0.6355	0.0967	0.3411	-0.3425	WT
1017	lusc_tcga_pan_can_atlas_2018	TCGA-21-1076-01	54	Female	SQ	0.9775	0.1946	-0.2951	-0.887	-0.6795	-0.3449	WT	White
1417	lusc_tcga_pan_can_atlas_2018	TCGA-MF-A522-01	54	Male	SQ	-0.332	0.4573	0.0204	1.5406	-0.5859	-0.5736	WT	White
493	luad_tcga_pan_can_atlas_2018	TCGA-97-8552-01	55	Female	Ad	-0.0012	0.2091	-1.4354	-0.7785	-0.1099	0.3557	MUT	White
1186	lusc_tcga_pan_can_atlas_2018	TCGA-56-A4BW-01	55	Male	SQ	2.1442	0.7727	-0.4546	-0.3783	-1.7092	1.1921	WT	White
119	luad_tcga_pan_can_atlas_2018	TCGA-50-5941-01	55	Female	Ad	1.2486	1.0334	0.3298	0.6857	-0.3844	0.4821	WT	White
1173	lusc_tcga_pan_can_atlas_2018	TCGA-56-8307-01	55	Female	SQ	-0.4951	1.0243	-0.1156	1.3847	-1.5923	0.4647	WT	White
1062	lusc_tcga_pan_can_atlas_2018	TCGA-33-4582-01	55	Male	SQ	-0.2018	-1.5802	0.2727	1.4862	0.7572	0.4233	WT	White
1140	lusc_tcga_pan_can_atlas_2018	TCGA-43-8118-01	55	Female	SQ	0.6119	0.3465	0.6562	1.3353	-1.1432	0.3482	WT	White
1245	lusc_tcga_pan_can_atlas_2018	TCGA-66-2727-01	55	Female	SQ	0.1939	-0.4376	1.1052	1.2219	-0.2753	0.2747	WT
194	luad_tcga_pan_can_atlas_2018	TCGA-55-8510-01	55	Female	Ad	0.4866	0.6784	0.0548	-0.34	0.1857	0.1838	WT	White
1149	lusc_tcga_pan_can_atlas_2018	TCGA-51-4081-01	55	Male	SQ	-1.2938	-1.2377	0.1536	0.43	0.3489	0.0905	WT	White
1377	lusc_tcga_pan_can_atlas_2018	TCGA-90-7769-01	55	Male	SQ	-1.5327	0.5842	1.0728	-0.692	0.4482	0.0465	WT	White
44	luad_tcga_pan_can_atlas_2018	TCGA-44-2665-01	55	Female	Ad	0.5648	-0.1591	-0.435	-0.3716	1.0877	-0.2031	WT	White
381	luad_tcga_pan_can_atlas_2018	TCGA-97-8175-01	55	Female	Ad	0.9527	0.5129	0.2628	-0.6922	0.0754	-0.2982	WT	White
235	luad_tcga_pan_can_atlas_2018	TCGA-64-5781-01	55	Female	Ad	0.1288	0.3143	0.1095	0.2016	2.3165	-0.4802	WT	White
215	luad_tcga_pan_can_atlas_2018	TCGA-62-8398-01	55	Male	Ad	-0.4568	-0.5723	1.102	-0.4745	1.5041	-0.7075	WT	White
137	luad_tcga_pan_can_atlas_2018	TCGA-55-1596-01	55	Male	Ad	-2.3535	0.938	-0.4092	2.0694	-0.5011	-3.3731	WT	Asian
459	luad_tcga_pan_can_atlas_2018	TCGA-55-8206-01	56	Male	Ad	0.8988	-0.7866	-1.0916	-0.891	-0.5309	0.9965	MUT	White
471	luad_tcga_pan_can_atlas_2018	TCGA-69-7765-01	56	Male	Ad	-0.0068	-0.5957	-1.4018	0.1087	-0.2677	0.6159	MUT	Black or African American
454	luad_tcga_pan_can_atlas_2018	TCGA-55-6980-01	56	Male	Ad	1.0596	-0.1267	-1.6049	-0.7333	-0.4785	0.4655	MUT	White
507	luad_tcga_pan_can_atlas_2018	TCGA-55-8089-01	56	Male	Ad	1.4072	1.4275	1.1709	-0.5802	1.0966	2.8298	WT	White
1487	lusc_tcga_pan_can_atlas_2018	TCGA-98-8020-01	56	Female	SQ	1.1064	1.2449	-0.5	-0.0352	0.1928	2.4304	WT	Black or African American
421	luad_tcga_pan_can_atlas_2018	TCGA-MP-A4TK-01	56	Female	Ad	-0.3579	-0.1531	0.8959	-1.9905	0.3367	1.0506	WT
303	luad_tcga_pan_can_atlas_2018	TCGA-78-7542-01	56	Male	Ad	0.6789	0.1383	1.5822	-0.1305	-1.1049	0.9038	WT	White
340	luad_tcga_pan_can_atlas_2018	TCGA-86-A4JF-01	56	Male	Ad	0.3155	1.3748	0.6686	1.2131	0.2194	0.6498	WT	White
1361	lusc_tcga_pan_can_atlas_2018	TCGA-85-A4CN-01	56	Female	SQ	-0.8901	0.0498	0.194	-1.4573	0.657	0.2498	WT	White
1274	lusc_tcga_pan_can_atlas_2018	TCGA-66-2788-01	56	Male	SQ	1.122	0.7829	-0.1053	-0.832	0.3246	0.1383	WT
1170	lusc_tcga_pan_can_atlas_2018	TCGA-56-8083-01	56	Male	SQ	-0.2803	-0.811	1.6852	-1.192	1.9441	0.0457	WT	White
403	luad_tcga_pan_can_atlas_2018	TCGA-L9-A743-01	56	Male	Ad	0.3268	1.6423	0.4945	-0.9803	-0.0537	-0.0578	WT	Black or African American
1376	lusc_tcga_pan_can_atlas_2018	TCGA-90-7767-01	56	Male	SQ	-0.2121	1.1601	0.8474	0.3142	0.2027	-0.0857	WT	White
57	luad_tcga_pan_can_atlas_2018	TCGA-44-6774-01	56	Female	Ad	-0.3841	-0.2944	-0.9189	-1.7369	-0.0163	-0.1389	WT	White
102	luad_tcga_pan_can_atlas_2018	TCGA-49-AARN-01	56	Female	Ad	0.9822	0.5548	-0.8241	0.2458	0.7235	-0.3109	WT	Black or African American
1237	lusc_tcga_pan_can_atlas_2018	TCGA-63-A5MP-01	56	Male	SQ	-0.1605	1.1042	-0.2974	-0.4958	-1.1413	-0.4118	WT
417	luad_tcga_pan_can_atlas_2018	TCGA-MP-A4TE-01	56	Male	Ad	-3.7063	0.6475	-0.6411	-0.0422	-0.389	-0.5179	WT	White
429	luad_tcga_pan_can_atlas_2018	TCGA-NJ-A55O-01	56	Female	Ad	-0.2882	-0.6115	-0.9253	-0.8143	-0.3362	-0.5716	WT	White
1221	lusc_tcga_pan_can_atlas_2018	TCGA-60-2726-01	56	Male	SQ	-0.5591	0.6371	-0.3133	-0.5556	-0.4978	-0.8507	WT	White
1295	lusc_tcga_pan_can_atlas_2018	TCGA-77-7139-01	56	Male	SQ	-1.3452	0.2926	0.1536	1.0163	-0.3031	-1.3298	WT	White
1099	lusc_tcga_pan_can_atlas_2018	TCGA-37-4130-01	56	Male	SQ	0.6601	-0.3566	1.5623	0.6356	0.2297	-2.5002	WT	White
1453	lusc_tcga_pan_can_atlas_2018	TCGA-46-3769-01	57	Male	SQ	0.9123	0.03	-0.778	-1.025	-0.4541	1.5991	MUT	White
437	luad_tcga_pan_can_atlas_2018	TCGA-05-4402-01	57	Female	Ad	0.6649	-0.3399	0.0977	0.1486	0.2921	1.3504	MUT
1463	lusc_tcga_pan_can_atlas_2018	TCGA-18-5592-01	57	Male	SQ	-1.4657	-0.093	-0.3284	0.1905	-0.5338	3.4478	WT
503	luad_tcga_pan_can_atlas_2018	TCGA-05-4415-01	57	Male	Ad	-1.0554	-1.7348	2.1103	0.8102	2.0334	1.9193	WT
1197	lusc_tcga_pan_can_atlas_2018	TCGA-58-8391-01	57	Female	SQ	-0.0904	-0.93	1.138	-0.2826	-2.8201	0.6834	WT	White
1367	lusc_tcga_pan_can_atlas_2018	TCGA-85-A50Z-01	57	Male	SQ	1.2375	0.8347	-0.2042	0.2131	0.1838	0.4637	WT	White
1439	lusc_tcga_pan_can_atlas_2018	TCGA-O2-A52S-01	57	Female	SQ	-0.6661	-0.1407	0.1333	0.4402	0.6199	0.4438	WT	White
1036	lusc_tcga_pan_can_atlas_2018	TCGA-22-4595-01	57	Male	SQ	0.2106	0.0683	1.6365	0.0943	-0.7241	0.3626	WT	White
1260	lusc_tcga_pan_can_atlas_2018	TCGA-66-2768-01	57	Male	SQ	0.7068	2.0874	1.3572	-0.149	0.802	0.2525	WT
1340	lusc_tcga_pan_can_atlas_2018	TCGA-85-8049-01	57	Male	SQ	0.3377	0.6121	-0.1467	-0.3974	-0.221	0.1817	WT	White
242	luad_tcga_pan_can_atlas_2018	TCGA-67-6216-01	57	Female	Ad	1.7619	0.3065	-0.3574	-0.162	0.4091	0.1631	WT	White
1064	lusc_tcga_pan_can_atlas_2018	TCGA-33-4586-01	57	Male	SQ	-0.4818	-0.9089	-0.54	1.5514	-1.2751	0.1579	WT	White
1016	lusc_tcga_pan_can_atlas_2018	TCGA-21-1075-01	57	Male	SQ	-0.6757	-2.5913	-0.0463	0.6955	0.6926	0.0729	WT	White
34	luad_tcga_pan_can_atlas_2018	TCGA-38-4626-01	57	Female	Ad	1.2214	1.5496	-0.7228	-0.6321	-0.1799	-0.1282	WT	White
407	luad_tcga_pan_can_atlas_2018	TCGA-MN-A4N4-01	57	Male	Ad	-0.7268	-0.7228	0.0763	-0.2711	1.2509	-0.2549	WT	White
1330	lusc_tcga_pan_can_atlas_2018	TCGA-85-6798-01	57	Male	SQ	-1.455	-1.525	1.5298	0.0424	0.4315	-0.2599	WT	White
1074	lusc_tcga_pan_can_atlas_2018	TCGA-33-AASL-01	57	Female	SQ	-0.8631	1.7417	-0.8914	1.0256	-0.5667	-0.4099	WT	Black or African American
26	luad_tcga_pan_can_atlas_2018	TCGA-05-5428-01	57	Male	Ad	0.281	-0.6393	1.0993	2.2142	1.312	-0.8817	WT
107	luad_tcga_pan_can_atlas_2018	TCGA-50-5045-01	57	Female	Ad	0.4557	0.7069	0.2515	-0.4461	1.527	-1.041	WT	Black or African American
96	luad_tcga_pan_can_atlas_2018	TCGA-49-AAR0-01	57	Male	Ad	-0.6617	1.2455	-0.0167	0.4787	0.8003	-1.2357	WT	Black or African American
29	luad_tcga_pan_can_atlas_2018	TCGA-35-3615-01	57	Male	Ad	-0.4646	-0.1082	-1.6623	0.7152	1.9503	-1.2955	WT	White
1273	lusc_tcga_pan_can_atlas_2018	TCGA-66-2787-01	57	Male	SQ	-0.1846	-0.9478	0.0989	1.6554	0.1996	-1.3671	WT
332	luad_tcga_pan_can_atlas_2018	TCGA-86-8585-01	57	Male	Ad	-1.0388	1.7133	0.7307	-1.0212	2.3576	-2.9417	WT	White
1477	lusc_tcga_pan_can_atlas_2018	TCGA-66-2792-01	58	Male	SQ	-0.0798	-1.06	0.6464	-0.6733	-0.3364	2.3406	WT
513	luad_tcga_pan_can_atlas_2018	TCGA-MP-A4TF-01	58	Female	Ad	-0.2857	-0.4683	-0.2537	0.6153	1.138	1.5045	WT	White
200	luad_tcga_pan_can_atlas_2018	TCGA-55-8616-01	58	Female	Ad	0.4626	0.5019	-1.4188	-1.6594	0.6201	0.8396	WT	White
229	luad_tcga_pan_can_atlas_2018	TCGA-64-1679-01	58	Female	Ad	1.0615	-0.1713	0.7517	0.0876	-0.0591	0.8332	WT	White
6	luad_tcga_pan_can_atlas_2018	TCGA-05-4390-01	58	Female	Ad	-0.3316	0.8	0.4703	0.5598	-0.2727	0.548	WT
152	luad_tcga_pan_can_atlas_2018	TCGA-55-6985-01	58	Female	Ad	1.1876	0.109	0.0189	-0.7234	-0.9444	0.4897	WT	White
1168	lusc_tcga_pan_can_atlas_2018	TCGA-56-7823-01	58	Female	SQ	-2.0038	-1.1115	0.3725	0.1644	0.7488	0.4522	WT	White
189	luad_tcga_pan_can_atlas_2018	TCGA-55-8301-01	58	Male	Ad	0.4811	1.3816	-0.0704	0.1215	0.4165	0.3538	WT	White
118	luad_tcga_pan_can_atlas_2018	TCGA-50-5936-01	58	Male	Ad	-0.3301	-0.4399	-0.2283	0.5518	1.0856	0.3269	WT	White
375	luad_tcga_pan_can_atlas_2018	TCGA-97-7553-01	58	Female	Ad	1.1108	0.2352	-0.2957	-0.9691	-1.2363	0.1636	WT	White
1486	lusc_tcga_pan_can_atlas_2018	TCGA-92-8064-01	58	Male	SQ	0.0436	1.3797	0.0153	0.1156	-0.4274	0.0716	WT	White
266	luad_tcga_pan_can_atlas_2018	TCGA-73-7498-01	58	Female	Ad	0.0851	-0.5828	-1.7914	-1.1035	-0.886	0.0267	WT	White
1302	lusc_tcga_pan_can_atlas_2018	TCGA-77-7465-01	58	Male	SQ	0.4129	-0.197	3.3158	0.6586	-0.323	0.0038	WT	White
74	luad_tcga_pan_can_atlas_2018	TCGA-44-8120-01	58	Male	Ad	-0.3898	-1.0672	-0.5782	-1.1893	-0.747	-0.1325	WT	Black or African American
1053	lusc_tcga_pan_can_atlas_2018	TCGA-22-5485-01	58	Female	SQ	-0.5658	-1.0575	-0.2143	0.1653	2.1494	-0.1745	WT	White
138	luad_tcga_pan_can_atlas_2018	TCGA-55-5899-01	58	Male	Ad	-0.388	-0.5827	0.0241	0.0992	-0.8869	-0.1777	WT	White
325	luad_tcga_pan_can_atlas_2018	TCGA-86-8073-01	58	Male	Ad	0.0378	-0.6842	-0.6864	0.5097	-1.2345	-0.2143	WT	White
226	luad_tcga_pan_can_atlas_2018	TCGA-64-1676-01	58	Male	Ad	1.6052	0.4009	0.7834	0.595	1.1737	-0.5949	WT	White
306	luad_tcga_pan_can_atlas_2018	TCGA-78-8648-01	58	Female	Ad	0.7209	1.1359	-0.1372	-0.8355	0.2973	-0.6735	WT
1425	lusc_tcga_pan_can_atlas_2018	TCGA-NC-A5HK-01	58	Female	SQ	0.074	-0.3974	0.8679	-0.2755	-0.085	-0.8293	WT	White
1146	lusc_tcga_pan_can_atlas_2018	TCGA-46-3768-01	58	Male	SQ	-0.6725	-1.1221	-0.7883	1.4888	0.8956	-0.9323	WT	White
1155	lusc_tcga_pan_can_atlas_2018	TCGA-56-1622-01	58	Male	SQ	0.0615	0.1185	-0.5917	-1.587	-0.4501	-0.9632	WT	White
1373	lusc_tcga_pan_can_atlas_2018	TCGA-85-A5B5-01	58	Male	SQ	-0.4853	-1.1616	-0.0386	1.0574	1.0544	-1.1163	WT	White
1206	lusc_tcga_pan_can_atlas_2018	TCGA-60-2706-01	58	Male	SQ	0.2065	0.0094	0.2997	0.4979	-0.4086	-3.7221	WT	White
478	luad_tcga_pan_can_atlas_2018	TCGA-78-7158-01	59	Female	Ad	0.2315	-2.1139	-0.2572	0.4836	1.4409	0.1714	MUT	White
1452	lusc_tcga_pan_can_atlas_2018	TCGA-46-3765-01	59	Female	SQ	-0.2212	-1.0633	-0.4326	0.6243	0.6237	0.1084	MUT	White
491	luad_tcga_pan_can_atlas_2018	TCGA-97-8177-01	59	Female	Ad	0.8005	0.2277	-0.2811	-0.6734	0.8725	0.0135	MUT	White
1122	lusc_tcga_pan_can_atlas_2018	TCGA-39-5040-01	59	Male	SQ	-1.3145	-1.2752	0.2434	-0.5957	1.168	2.5116	WT	White
1182	lusc_tcga_pan_can_atlas_2018	TCGA-56-8626-01	59	Male	SQ	0.3383	1.0175	-2.4048	-0.7855	-1.9753	1.2503	WT	White
1335	lusc_tcga_pan_can_atlas_2018	TCGA-85-7710-01	59	Female	SQ	0.3257	0.808	0.3646	1.1519	-1.2398	1.09	WT	White
40	luad_tcga_pan_can_atlas_2018	TCGA-44-2656-01	59	Male	Ad	0.6909	0.3782	-0.0736	1.1253	-0.7767	0.9088	WT	White
313	luad_tcga_pan_can_atlas_2018	TCGA-83-5908-01	59	Female	Ad	0.8214	0.83	0.9473	-0.0395	0.2787	0.798	WT	White
248	luad_tcga_pan_can_atlas_2018	TCGA-69-7978-01	59	Male	Ad	1.0174	0.7712	0.2296	0.533	0.5241	0.6659	WT	White
148	luad_tcga_pan_can_atlas_2018	TCGA-55-6979-01	59	Female	Ad	0.9248	1.2976	0.3646	-0.3055	-0.7893	0.6269	WT	White
1421	lusc_tcga_pan_can_atlas_2018	TCGA-NC-A5HG-01	59	Male	SQ	0.0085	1.5203	0.3344	-0.5506	-0.6239	0.5236	WT	White
1132	lusc_tcga_pan_can_atlas_2018	TCGA-43-6770-01	59	Female	SQ	-0.3321	-0.4523	0.3854	-0.7779	0.6893	0.4875	WT	Black or African American
347	luad_tcga_pan_can_atlas_2018	TCGA-91-6840-01	59	Female	Ad	-1.4646	-0.7526	1.2413	0.687	0.1595	0.4348	WT	White
348	luad_tcga_pan_can_atlas_2018	TCGA-91-6848-01	59	Male	Ad	-0.4353	0.3001	1.8345	0.7184	-0.4095	0.3972	WT	White
177	luad_tcga_pan_can_atlas_2018	TCGA-55-8087-01	59	Female	Ad	0.0926	-1.4477	-2.395	0.1345	0.2571	0.2524	WT	White
341	luad_tcga_pan_can_atlas_2018	TCGA-86-A4P8-01	59	Female	Ad	0.6158	0.2721	-2.2733	-1.8563	-0.3623	0.1424	WT	White
1297	lusc_tcga_pan_can_atlas_2018	TCGA-77-7142-01	59	Female	SQ	0.2537	-2.5044	0.067	1.0909	-1.5534	0.0582	WT	White
285	luad_tcga_pan_can_atlas_2018	TCGA-78-7150-01	59	Male	Ad	-1.6489	0.5879	1.9757	0.905	1.4681	-0.0096	WT	White
1200	lusc_tcga_pan_can_atlas_2018	TCGA-58-A46K-01	59	Male	SQ	-1.6187	-0.2395	-0.6564	-0.0413	-0.674	-0.0908	WT	White
68	luad_tcga_pan_can_atlas_2018	TCGA-44-7669-01	59	Male	Ad	-0.342	-0.6642	2.0943	0.9898	-0.4088	-0.1056	WT	Black or African American
1069	lusc_tcga_pan_can_atlas_2018	TCGA-33-AAS8-01	59	Female	SQ	-1.7195	-1.3507	-0.8295	0.7093	0.9432	-0.3852	WT	Black or African American
144	luad_tcga_pan_can_atlas_2018	TCGA-55-6971-01	59	Female	Ad	0.7587	-0.0007	0.3886	-0.7335	1.4466	-0.3872	WT	White
21	luad_tcga_pan_can_atlas_2018	TCGA-05-4430-01	59	Female	Ad	0.3891	0.35	0.7353	-0.0955	0.9044	-0.3993	WT
1106	lusc_tcga_pan_can_atlas_2018	TCGA-37-A5EN-01	59	Male	SQ	-1.7692	-0.3618	-0.0809	-0.3833	-1.7288	-0.5734	WT	White
61	luad_tcga_pan_can_atlas_2018	TCGA-44-6778-01	59	Male	Ad	0.7468	0.2713	0.3169	-0.5164	-1.7304	-0.634	WT	Black or African American
263	luad_tcga_pan_can_atlas_2018	TCGA-73-4675-01	59	Male	Ad	-1.8714	0.6944	-0.6417	-1.8472	0.7216	-0.7434	WT	White
251	luad_tcga_pan_can_atlas_2018	TCGA-69-8253-01	59	Female	Ad	-0.7591	-1.0338	-1.1556	-0.3975	0.9356	-1.0509	WT	Black or African American
354	luad_tcga_pan_can_atlas_2018	TCGA-91-A4BC-01	59	Male	Ad	0.4979	0.5456	0.2347	-0.9845	-0.3703	-1.4173	WT	White
1424	lusc_tcga_pan_can_atlas_2018	TCGA-NC-A5HJ-01	59	Male	SQ	0.8406	-0.2763	0.9871	-1.492	-1.6811	-1.5176	WT	White
111	luad_tcga_pan_can_atlas_2018	TCGA-50-5068-01	59	Female	Ad	0.8969	1.0896	0.8402	-0.4816	1.9063	-1.928	WT	White
335	luad_tcga_pan_can_atlas_2018	TCGA-86-8672-01	59	Male	Ad	-0.2175	0.7432	0.2512	0.3293	-1.4238	-2.2221	WT	White
305	luad_tcga_pan_can_atlas_2018	TCGA-78-8640-01	59	Male	Ad	-1.06	-0.1292	0.1591	1.4035	1.4023	-2.3052	WT
1124	lusc_tcga_pan_can_atlas_2018	TCGA-43-2578-01	59	Female	SQ	0.1804	-1.0741	1.3681	0.8765	0.0735	-2.3766	WT	White
1328	lusc_tcga_pan_can_atlas_2018	TCGA-85-6560-01	59	Male	SQ	0.7521	-0.536	1.5537	-0.3792	-0.8768	-2.9175	WT	White
461	luad_tcga_pan_can_atlas_2018	TCGA-55-A48Z-01	60	Female	Ad	-0.075	0.3419	0.1283	-0.9062	0.2177	1.2856	MUT	White
472	luad_tcga_pan_can_atlas_2018	TCGA-71-8520-01	60	Female	Ad	0.2093	0.5358	-0.5961	-0.7221	0.0337	1.275	MUT	Asian
1459	lusc_tcga_pan_can_atlas_2018	TCGA-77-8156-01	60	Male	SQ	0.0958	0.2031	1.1544	-1.3312	-0.4056	0.1449	MUT
456	luad_tcga_pan_can_atlas_2018	TCGA-55-7570-01	60	Male	Ad	-2.0463	-2.6292	1.0628	1.6654	-1.4892	-3.6964	MUT	Black or African American
1282	lusc_tcga_pan_can_atlas_2018	TCGA-68-7755-01	60	Female	SQ	-1.428	-1.2873	-1.0216	-0.0317	-0.1939	1.9742	WT	White
512	luad_tcga_pan_can_atlas_2018	TCGA-L9-A444-01	60	Female	Ad	-0.2013	1.4796	0.3156	-0.5074	-0.39	1.4028	WT	White
1084	lusc_tcga_pan_can_atlas_2018	TCGA-34-5236-01	60	Male	SQ	0.2688	0.8887	0.5153	1.1098	0.0503	0.9727	WT	White
1371	lusc_tcga_pan_can_atlas_2018	TCGA-85-A513-01	60	Female	SQ	1.4199	1.0705	-0.2136	-2.3755	0.6228	0.9654	WT	Asian
1195	lusc_tcga_pan_can_atlas_2018	TCGA-58-8388-01	60	Male	SQ	0.2866	0.2148	0.4423	-0.2146	0.3728	0.9631	WT	White
385	luad_tcga_pan_can_atlas_2018	TCGA-97-A4M0-01	60	Female	Ad	1.015	0.653	-1.5478	0.1811	0.593	0.9561	WT	White
231	luad_tcga_pan_can_atlas_2018	TCGA-64-5774-01	60	Male	Ad	-1.5277	-0.2392	0.5591	-0.0532	0.6667	0.8958	WT	White
1160	lusc_tcga_pan_can_atlas_2018	TCGA-56-7222-01	60	Male	SQ	1.7087	-1.2848	1.4271	-0.4596	-1.0937	0.886	WT	White
1480	lusc_tcga_pan_can_atlas_2018	TCGA-77-8128-01	60	Male	SQ	-1.874	-1.463	0.1018	-0.6491	-0.9222	0.7827	WT
56	luad_tcga_pan_can_atlas_2018	TCGA-44-6148-01	60	Male	Ad	0.7432	-2.179	-0.9522	-0.8289	0.11	0.5794	WT	White
139	luad_tcga_pan_can_atlas_2018	TCGA-55-6543-01	60	Female	Ad	0.8036	-0.7815	-1.1705	-0.6641	0.529	0.4649	WT	White
193	luad_tcga_pan_can_atlas_2018	TCGA-55-8508-01	60	Female	Ad	-1.1687	0.4975	-0.5473	-0.14	0.9426	0.4239	WT	Black or African American
290	luad_tcga_pan_can_atlas_2018	TCGA-78-7159-01	60	Female	Ad	-0.5387	-1.7202	0.385	-0.1162	-0.8723	0.3395	WT	White
51	luad_tcga_pan_can_atlas_2018	TCGA-44-4112-01	60	Female	Ad	0.4545	-1.6941	0.416	0.7983	0.6589	0.2971	WT	White
294	luad_tcga_pan_can_atlas_2018	TCGA-78-7163-01	60	Male	Ad	-1.1882	-2.7235	-2.8124	-0.3758	-0.1255	0.2754	WT	White
255	luad_tcga_pan_can_atlas_2018	TCGA-69-A59K-01	60	Female	Ad	-1.08	-0.2219	0.0416	1.184	-0.3913	0.2606	WT	Black or African American
1067	lusc_tcga_pan_can_atlas_2018	TCGA-33-A4WN-01	60	Male	SQ	-0.3485	-1.0711	-0.5265	1.337	-0.6259	0.1781	WT	White
182	luad_tcga_pan_can_atlas_2018	TCGA-55-8097-01	60	Female	Ad	0.0859	-0.8991	-0.8325	0.1398	-0.0229	0.1452	WT	White
406	luad_tcga_pan_can_atlas_2018	TCGA-MN-A4N1-01	60	Male	Ad	-0.5802	-0.1385	0.1713	-0.8039	0.1655	-0.0458	WT	Black or African American
59	luad_tcga_pan_can_atlas_2018	TCGA-44-6776-01	60	Female	Ad	-0.9026	-0.8517	-1.576	-1.3729	0.3482	-0.2451	WT	White
49	luad_tcga_pan_can_atlas_2018	TCGA-44-3918-01	60	Female	Ad	0.6966	0.6762	-0.3226	0.9598	0.333	-0.2928	WT	White
1344	lusc_tcga_pan_can_atlas_2018	TCGA-85-8072-01	60	Male	SQ	-0.5212	0.2397	0.6871	0.9197	-1.4332	-0.6571	WT	White
27	luad_tcga_pan_can_atlas_2018	TCGA-05-5429-01	60	Male	Ad	-0.078	-1.5185	0.2543	2.0799	1.3408	-0.7324	WT
1194	lusc_tcga_pan_can_atlas_2018	TCGA-58-8387-01	60	Male	SQ	-1.0052	0.2613	1.0338	0.5132	0.6239	-0.7411	WT	White
1152	lusc_tcga_pan_can_atlas_2018	TCGA-52-7810-01	60	Female	SQ	1.1384	-1.4551	-0.9741	0.1728	-1.2232	-0.9078	WT	White
127	luad_tcga_pan_can_atlas_2018	TCGA-50-7109-01	60	Male	Ad	-0.5856	-1.0462	1.2305	0.6452	-0.0025	-0.9767	WT	White
1419	lusc_tcga_pan_can_atlas_2018	TCGA-NC-A5HE-01	60	Male	SQ	0.8075	1.0035	0.6018	-2.4635	-0.9574	-1.0357	WT	White
1073	lusc_tcga_pan_can_atlas_2018	TCGA-33-AASJ-01	60	Male	SQ	-0.1106	0.2996	1.8806	-0.3732	-0.2442	-1.2278	WT	Black or African American
1263	lusc_tcga_pan_can_atlas_2018	TCGA-66-2771-01	60	Male	SQ	0.9023	-0.1203	0.1993	1.4988	-0.6964	-1.2527	WT
233	luad_tcga_pan_can_atlas_2018	TCGA-64-5778-01	60	Male	Ad	0.2197	0.4232	0.251	1.135	2.2814	-1.2961	WT	White
1215	lusc_tcga_pan_can_atlas_2018	TCGA-60-2720-01	60	Female	SQ	0.855	1.1648	-0.9404	0.1388	2.7	-1.4052	WT	White
1035	lusc_tcga_pan_can_atlas_2018	TCGA-22-4594-01	60	Female	SQ	0.4381	-0.1319	-0.8707	-1.2627	-0.9799	-1.9305	WT
483	luad_tcga_pan_can_atlas_2018	TCGA-86-8668-01	61	Female	Ad	0.4967	-0.1876	-1.0275	-1.7314	0.3408	2.2288	MUT	White
443	luad_tcga_pan_can_atlas_2018	TCGA-44-5645-01	61	Female	Ad	0.4659	-1.1541	-0.7496	-0.5217	-0.1904	0.9333	MUT	Black or African American
466	luad_tcga_pan_can_atlas_2018	TCGA-64-1681-01	61	Female	Ad	0.0468	-0.549	-1.289	-0.3903	0.0192	0.4539	MUT	White
453	luad_tcga_pan_can_atlas_2018	TCGA-55-6968-01	61	Male	Ad	-0.6129	-0.2813	2.4569	0.7771	0.2218	-1.8193	MUT	White
319	luad_tcga_pan_can_atlas_2018	TCGA-86-7714-01	61	Female	Ad	1.7894	-1.4932	-1.0623	-0.4994	0.2414	1.0217	WT	Black or African American
323	luad_tcga_pan_can_atlas_2018	TCGA-86-8054-01	61	Male	Ad	-0.8597	-2.3218	2.0517	0.2395	-0.103	0.9716	WT	White
1162	lusc_tcga_pan_can_atlas_2018	TCGA-56-7579-01	61	Male	SQ	-0.947	-0.344	-0.8078	-0.1107	-1.7697	0.5969	WT	White
83	luad_tcga_pan_can_atlas_2018	TCGA-49-4505-01	61	Female	Ad	1.0384	0.4704	-0.827	0.7319	0.7693	0.3862	WT	White
210	luad_tcga_pan_can_atlas_2018	TCGA-55-A494-01	61	Female	Ad	-0.9143	-0.2012	-0.0321	-0.081	-1.9241	0.3305	WT	White
66	luad_tcga_pan_can_atlas_2018	TCGA-44-7662-01	61	Male	Ad	0.2832	-0.2464	0.8258	0.1935	-0.2598	0.3016	WT	White
1143	lusc_tcga_pan_can_atlas_2018	TCGA-43-A56V-01	61	Male	SQ	0.1704	0.3422	0.0961	0.8916	1.6859	0.0959	WT	Black or African American
410	luad_tcga_pan_can_atlas_2018	TCGA-MP-A4SY-01	61	Male	Ad	0.2703	0.4472	-0.1883	0.0912	-1.1817	0.0805	WT	White
188	luad_tcga_pan_can_atlas_2018	TCGA-55-8299-01	61	Female	Ad	0.7217	0.9925	-0.1143	-0.6394	-0.0792	0.0406	WT	White
1349	lusc_tcga_pan_can_atlas_2018	TCGA-85-8350-01	61	Male	SQ	0.3722	0.3802	-0.882	-0.106	0.5916	-0.0186	WT	White
146	luad_tcga_pan_can_atlas_2018	TCGA-55-6975-01	61	Male	Ad	-1.48	-0.0906	0.4707	-0.4416	-0.6985	-0.0893	WT	White
396	luad_tcga_pan_can_atlas_2018	TCGA-J2-A4AD-01	61	Female	Ad	-0.5172	0.4416	0.5792	-0.0022	-1.3658	-0.1815	WT	White
1393	lusc_tcga_pan_can_atlas_2018	TCGA-94-A5I4-01	61	Male	SQ	-1.0374	0.9888	1.2369	-1.342	-1.6323	-0.2287	WT	White
172	luad_tcga_pan_can_atlas_2018	TCGA-55-7913-01	61	Female	Ad	-1.7629	-0.0022	0.2962	2.0562	0.9793	-0.3606	WT	Black or African American
336	luad_tcga_pan_can_atlas_2018	TCGA-86-8673-01	61	Male	Ad	-0.8659	1.7332	0.0209	1.7872	0.7944	-0.3631	WT	White
1402	lusc_tcga_pan_can_atlas_2018	TCGA-98-8022-01	61	Male	SQ	-0.3777	0.5278	-0.7571	0.0635	0.7432	-0.3936	WT	White
291	luad_tcga_pan_can_atlas_2018	TCGA-78-7160-01	61	Male	Ad	0.103	-0.4292	-0.3794	-0.5556	-1.8081	-0.4217	WT	White
364	luad_tcga_pan_can_atlas_2018	TCGA-95-7567-01	61	Male	Ad	0.3782	0.2698	-0.7381	0.3923	0.0032	-0.4254	WT	White
392	luad_tcga_pan_can_atlas_2018	TCGA-99-8032-01	61	Male	Ad	-0.8769	-0.639	0.343	-0.6724	0.1034	-0.6415	WT	White
1381	lusc_tcga_pan_can_atlas_2018	TCGA-90-A59Q-01	61	Female	SQ	0.2972	0.9709	0.3303	-1.1133	-0.9453	-0.725	WT	White
234	luad_tcga_pan_can_atlas_2018	TCGA-64-5779-01	61	Male	Ad	-0.7833	-1.1262	0.8344	-0.5069	-0.7656	-0.747	WT	White
1021	lusc_tcga_pan_can_atlas_2018	TCGA-21-1082-01	61	Male	SQ	-0.283	-0.24	0.8087	0.9559	-0.2839	-0.945	WT	White
100	luad_tcga_pan_can_atlas_2018	TCGA-49-AAR9-01	61	Male	Ad	-2.1757	0.3294	0.9192	0.1729	4.3111	-1.367	WT	Black or African American
32	luad_tcga_pan_can_atlas_2018	TCGA-35-5375-01	61	Male	Ad	-1.3967	-0.5839	0.9585	2.0702	3.58	-1.8452	WT	White
1364	lusc_tcga_pan_can_atlas_2018	TCGA-85-A4PA-01	61	Male	SQ	0.1085	0.0117	0.8441	-2.1052	-0.1992	-2.6864	WT	White
1100	lusc_tcga_pan_can_atlas_2018	TCGA-37-4132-01	61	Female	SQ	-0.255	-1.0586	-0.2207	0.3385	0.3342	-4.0455	WT	White
438	luad_tcga_pan_can_atlas_2018	TCGA-05-4410-01	62	Male	Ad	0.8408	1.4059	-0.2583	-0.1106	0.2662	1.6688	MUT
480	luad_tcga_pan_can_atlas_2018	TCGA-86-8074-01	62	Female	Ad	1.4506	0.2685	0.7742	1.1755	-1.3161	1.4608	MUT	White
460	luad_tcga_pan_can_atlas_2018	TCGA-55-8506-01	62	Female	Ad	1.3844	1.2886	-0.6942	-0.6835	0.2985	0.7084	MUT	White
1455	lusc_tcga_pan_can_atlas_2018	TCGA-60-2698-01	62	Male	SQ	0.7617	1.2371	0.5544	-0.197	1.8437	0.6622	MUT	White
511	luad_tcga_pan_can_atlas_2018	TCGA-91-6847-01	62	Female	Ad	-0.3364	-3.7533	1.4367	-0.1919	0.4084	2.6229	WT	White
370	luad_tcga_pan_can_atlas_2018	TCGA-95-A4VN-01	62	Female	Ad	0.1096	1.5953	0.6169	0.3904	-0.7945	1.2436	WT	White
121	luad_tcga_pan_can_atlas_2018	TCGA-50-5946-01	62	Male	Ad	0.0511	-1.3821	0.9106	1.3846	-0.263	1.1465	WT	White
216	luad_tcga_pan_can_atlas_2018	TCGA-62-8399-01	62	Male	Ad	-0.5368	0.2403	1.1364	-1.4932	0.629	0.7763	WT	White
280	luad_tcga_pan_can_atlas_2018	TCGA-78-7143-01	62	Female	Ad	0.1601	-0.6231	1.4144	0.8071	-1.3684	0.6382	WT	White
1092	lusc_tcga_pan_can_atlas_2018	TCGA-34-8454-01	62	Female	SQ	1.9663	0.7184	-0.1286	-1.6327	-1.4601	0.551	WT	White
1246	lusc_tcga_pan_can_atlas_2018	TCGA-66-2734-01	62	Female	SQ	1.5947	0.2495	-0.3098	0.394	0.6568	0.4389	WT
322	luad_tcga_pan_can_atlas_2018	TCGA-86-7955-01	62	Male	Ad	-2.3114	-2.8431	0.989	0.2695	0.2851	0.199	WT	White
1345	lusc_tcga_pan_can_atlas_2018	TCGA-85-8276-01	62	Male	SQ	-0.0237	-0.0688	0.664	0.5126	0.2796	0.1621	WT	White
1369	lusc_tcga_pan_can_atlas_2018	TCGA-85-A511-01	62	Male	SQ	0.2713	0.4906	-0.0069	-0.4712	-0.8892	0.0736	WT	White
1259	lusc_tcga_pan_can_atlas_2018	TCGA-66-2767-01	62	Male	SQ	0.5906	1.4327	0.9277	0.3741	-0.0266	0.0035	WT
1339	lusc_tcga_pan_can_atlas_2018	TCGA-85-8048-01	62	Male	SQ	0.3912	0.6622	-0.0966	-0.7425	1.0256	-0.0038	WT	White
420	luad_tcga_pan_can_atlas_2018	TCGA-MP-A4TJ-01	62	Female	Ad	0.1742	1.1197	0.0539	-0.5162	0.3477	-0.047	WT
1466	lusc_tcga_pan_can_atlas_2018	TCGA-33-4589-01	62	Female	SQ	1.1781	2.6585	0.6298	0.7245	0.7179	-0.0767	WT	White
1033	lusc_tcga_pan_can_atlas_2018	TCGA-22-1017-01	62	Male	SQ	0.9059	0.6471	-1.2602	-0.7462	-2.6328	-0.0908	WT	White
1394	lusc_tcga_pan_can_atlas_2018	TCGA-94-A5I6-01	62	Male	SQ	-1.2032	0.5224	0.1912	-0.2173	1.3273	-0.1232	WT	White
1229	lusc_tcga_pan_can_atlas_2018	TCGA-63-A5MB-01	62	Male	SQ	-1.0576	-0.6744	-0.0229	-0.6388	-1.2292	-0.2357	WT
1150	lusc_tcga_pan_can_atlas_2018	TCGA-52-7622-01	62	Female	SQ	0.7891	0.9063	-0.651	-0.175	-0.4329	-0.341	WT	White
191	luad_tcga_pan_can_atlas_2018	TCGA-55-8505-01	62	Male	Ad	-1.8492	0.668	0.7603	0.0285	-0.3951	-0.4273	WT	White
289	luad_tcga_pan_can_atlas_2018	TCGA-78-7156-01	62	Male	Ad	-0.7598	-0.9355	-1.7207	0.1626	0.1404	-0.5134	WT	White
1144	lusc_tcga_pan_can_atlas_2018	TCGA-46-3766-01	62	Female	SQ	1.4648	-0.1693	-1.4637	-0.8959	-0.1362	-0.5272	WT	White
350	luad_tcga_pan_can_atlas_2018	TCGA-91-7771-01	62	Male	Ad	-0.013	-0.4426	-0.8281	-1.3816	-1.4734	-0.6971	WT	White
54	luad_tcga_pan_can_atlas_2018	TCGA-44-6145-01	62	Female	Ad	1.0142	0.8812	0.2567	0.0804	-0.5176	-0.8152	WT	White
1123	lusc_tcga_pan_can_atlas_2018	TCGA-43-2576-01	62	Female	SQ	0.2724	1.344	0.0015	-0.929	1.2992	-0.92	WT	White
1298	lusc_tcga_pan_can_atlas_2018	TCGA-77-7335-01	62	Female	SQ	1.0927	-0.3684	-1.0695	-0.2306	0.8685	-1.0388	WT	White
450	luad_tcga_pan_can_atlas_2018	TCGA-50-6591-01	63	Female	Ad	-1.7291	-3.8109	2.9965	-0.1912	1.7015	3.1074	MUT	White
484	luad_tcga_pan_can_atlas_2018	TCGA-86-A4P7-01	63	Female	Ad	-0.0952	0.7344	-0.6135	-1.1485	-0.8995	0.4102	MUT	White
1327	lusc_tcga_pan_can_atlas_2018	TCGA-85-6175-01	63	Female	SQ	1.2658	0.1326	-1.0613	-1.782	-0.4794	0.9004	WT	White
140	luad_tcga_pan_can_atlas_2018	TCGA-55-6642-01	63	Male	Ad	-0.2929	-0.7675	-0.5031	-0.9506	-0.7154	0.8828	WT	White
128	luad_tcga_pan_can_atlas_2018	TCGA-50-8457-01	63	Female	Ad	0.9375	-0.3443	-1.7666	-0.6715	0.4509	0.8085	WT	Black or African American
327	luad_tcga_pan_can_atlas_2018	TCGA-86-8278-01	63	Female	Ad	1.6042	-0.0654	-0.7299	0.2584	0.1453	0.7346	WT	White
1011	lusc_tcga_pan_can_atlas_2018	TCGA-18-4083-01	63	Male	SQ	-0.8135	-0.4445	1.2274	-0.343	0.3267	0.6478	WT	White
204	luad_tcga_pan_can_atlas_2018	TCGA-55-A48X-01	63	Female	Ad	0.9905	-0.0614	0.0251	-0.1465	-0.5612	0.5554	WT	White
1372	lusc_tcga_pan_can_atlas_2018	TCGA-85-A53L-01	63	Male	SQ	0.3583	-1.6231	-0.2658	0.4612	-1.436	0.4543	WT	Asian
1405	lusc_tcga_pan_can_atlas_2018	TCGA-98-A539-01	63	Male	SQ	-0.7042	1.1948	-0.5425	-0.0646	-0.3119	0.3977	WT	White
1251	lusc_tcga_pan_can_atlas_2018	TCGA-66-2755-01	63	Male	SQ	0.428	0.6478	-0.5229	0.0387	0.1377	0.3735	WT
362	luad_tcga_pan_can_atlas_2018	TCGA-95-7043-01	63	Female	Ad	-1.3745	-1.5227	0.6009	2.8734	1.9614	0.3561	WT	White
324	luad_tcga_pan_can_atlas_2018	TCGA-86-8056-01	63	Female	Ad	1.4458	-0.7835	-1.5318	-0.6434	-0.5581	0.3365	WT	White
351	luad_tcga_pan_can_atlas_2018	TCGA-91-8496-01	63	Female	Ad	0.6875	-0.2975	-0.5995	0.2148	1.3123	0.3179	WT	White
95	luad_tcga_pan_can_atlas_2018	TCGA-49-AAQV-01	63	Female	Ad	0.1093	0.7933	0.478	1.1602	-1.3321	0.3092	WT	Black or African American
1352	lusc_tcga_pan_can_atlas_2018	TCGA-85-8355-01	63	Male	SQ	0.5447	0.5647	0.3536	-1.1982	-1.4429	0.2947	WT	White
1319	lusc_tcga_pan_can_atlas_2018	TCGA-77-A5G3-01	63	Male	SQ	-1.2014	-0.3965	0.1613	1.5151	0.1546	0.2829	WT
1256	lusc_tcga_pan_can_atlas_2018	TCGA-66-2763-01	63	Female	SQ	0.0206	0.9899	1.1304	1.0416	1.4537	0.089	WT
408	luad_tcga_pan_can_atlas_2018	TCGA-MN-A4N5-01	63	Male	Ad	0.3113	0.3427	0.3146	0.0588	-0.8799	0.0572	WT	White
1441	lusc_tcga_pan_can_atlas_2018	TCGA-O2-A52W-01	63	Male	SQ	-0.2164	-1.0833	0.0847	0.7723	0.0652	0.0346	WT	Black or African American
1244	lusc_tcga_pan_can_atlas_2018	TCGA-63-A5MY-01	63	Male	SQ	-2.9761	-1.1231	0.0301	-0.176	0.5439	-0.0112	WT
401	luad_tcga_pan_can_atlas_2018	TCGA-L9-A443-01	63	Female	Ad	0.773	1.2554	0.2089	-1.0266	0.3815	-0.0948	WT	White
1321	lusc_tcga_pan_can_atlas_2018	TCGA-77-A5G7-01	63	Male	SQ	-1.3721	0.5094	0.3045	1.2637	0.9197	-0.1639	WT
1004	lusc_tcga_pan_can_atlas_2018	TCGA-18-3411-01	63	Female	SQ	0.296	-0.0631	1.2112	0.3094	0.6942	-0.3403	WT
230	luad_tcga_pan_can_atlas_2018	TCGA-64-1680-01	63	Male	Ad	1.7099	-1.3362	-0.4477	-0.1494	1.1087	-0.5003	WT	White
1184	lusc_tcga_pan_can_atlas_2018	TCGA-56-8629-01	63	Male	SQ	1.3585	0.9208	-1.794	0.7619	1.0645	-0.5513	WT	White
382	luad_tcga_pan_can_atlas_2018	TCGA-97-8176-01	63	Male	Ad	-0.6259	0.433	0.9452	1.3641	-0.5234	-0.8514	WT	White
134	luad_tcga_pan_can_atlas_2018	TCGA-53-A4EZ-01	63	Male	Ad	-2.546	-1.6016	0.9113	1.3143	1.4747	-0.8562	WT	White
1029	lusc_tcga_pan_can_atlas_2018	TCGA-22-1005-01	63	Male	SQ	0.8597	0.5929	-0.7035	-1.2318	-0.4139	-1.3258	WT	White
1101	lusc_tcga_pan_can_atlas_2018	TCGA-37-4133-01	63	Male	SQ	0.9441	-0.0542	-0.3072	1.2577	0.53	-1.4098	WT	White
1456	lusc_tcga_pan_can_atlas_2018	TCGA-60-2708-01	64	Female	SQ	0.5552	-0.5088	-0.5566	-0.2974	1.2077	0.7736	MUT	White
486	luad_tcga_pan_can_atlas_2018	TCGA-93-A4JP-01	64	Male	Ad	-0.6291	-0.0533	-0.7876	-0.5296	-1.3501	0.5334	MUT	Asian
440	luad_tcga_pan_can_atlas_2018	TCGA-38-4627-01	64	Female	Ad	0.7999	-0.0219	-0.365	0.3674	1.062	0.0299	MUT	White
1479	lusc_tcga_pan_can_atlas_2018	TCGA-77-7141-01	64	Male	SQ	-0.5656	-1.6748	1.3231	0.6837	-1.1406	1.1481	WT	White
1331	lusc_tcga_pan_can_atlas_2018	TCGA-85-7696-01	64	Male	SQ	0.6238	-0.7894	-1.185	1.4887	-0.8571	0.902	WT	White
1300	lusc_tcga_pan_can_atlas_2018	TCGA-77-7338-01	64	Male	SQ	0.101	0.0065	-1.9761	0.0984	-1.4472	0.7318	WT	White
1054	lusc_tcga_pan_can_atlas_2018	TCGA-22-5489-01	64	Male	SQ	0.2284	1.0371	1.2095	0.8045	1.7176	0.4119	WT	White
55	luad_tcga_pan_can_atlas_2018	TCGA-44-6146-01	64	Male	Ad	-0.3524	-2.4645	-0.7775	-0.5014	-2.086	0.319	WT	White
168	luad_tcga_pan_can_atlas_2018	TCGA-55-7903-01	64	Male	Ad	0.3485	0.2488	0.6896	0.5181	-0.961	0.2593	WT	White
1211	lusc_tcga_pan_can_atlas_2018	TCGA-60-2713-01	64	Male	SQ	0.7799	0.1213	-0.8472	0.8182	0.7698	0.2211	WT	White
91	luad_tcga_pan_can_atlas_2018	TCGA-49-6744-01	64	Female	Ad	0.7067	0.4354	-0.3825	0.2284	0.6032	0.0887	WT	White
1374	lusc_tcga_pan_can_atlas_2018	TCGA-90-6837-01	64	Male	SQ	0.8261	-0.0941	-1.8267	-0.116	-0.1004	0.0811	WT	White
1257	lusc_tcga_pan_can_atlas_2018	TCGA-66-2765-01	64	Male	SQ	1.2919	1.4164	-0.1329	0.4949	1.1523	0.0317	WT
1389	lusc_tcga_pan_can_atlas_2018	TCGA-94-8035-01	64	Male	SQ	-0.3348	-0.2767	0.5949	1.2134	0.3644	0.0038	WT	White
176	luad_tcga_pan_can_atlas_2018	TCGA-55-8085-01	64	Male	Ad	-0.6557	0.9793	0.5523	1.4279	-1.9278	-0.164	WT	White
1210	lusc_tcga_pan_can_atlas_2018	TCGA-60-2711-01	64	Female	SQ	-0.8061	-0.838	0.7512	-0.0619	0.5494	-0.2234	WT	White
1025	lusc_tcga_pan_can_atlas_2018	TCGA-21-5786-01	64	Male	SQ	-0.453	-0.3504	0.5386	-0.2693	2.116	-0.2499	WT	White
1199	lusc_tcga_pan_can_atlas_2018	TCGA-58-A46J-01	64	Male	SQ	0.0524	0.2449	0.9335	0.1555	-0.7197	-0.274	WT	White
70	luad_tcga_pan_can_atlas_2018	TCGA-44-7671-01	64	Male	Ad	-0.6348	-0.4874	-0.9843	-0.2666	-1.5089	-0.2932	WT	Black or African American
1048	lusc_tcga_pan_can_atlas_2018	TCGA-22-5479-01	64	Male	SQ	-0.4668	0.2902	0.2123	1.3553	0.912	-0.341	WT	White
1314	lusc_tcga_pan_can_atlas_2018	TCGA-77-8150-01	64	Male	SQ	-1.3927	-0.2985	-0.3153	0.3968	0.2618	-0.3546	WT
159	luad_tcga_pan_can_atlas_2018	TCGA-55-7574-01	64	Female	Ad	0.3856	0.707	-0.6598	-0.6005	-0.0287	-0.3635	WT	White
1012	lusc_tcga_pan_can_atlas_2018	TCGA-18-4086-01	64	Male	SQ	-0.4551	-0.1498	0.3098	0.7656	-0.4359	-0.4947	WT
1279	lusc_tcga_pan_can_atlas_2018	TCGA-66-2794-01	64	Male	SQ	-0.25	2.0116	0.5915	0.0942	-1.4359	-0.5111	WT
333	luad_tcga_pan_can_atlas_2018	TCGA-86-8669-01	64	Male	Ad	-0.4278	0.5714	-0.8311	-0.0544	-1.081	-0.7285	WT	White
1411	lusc_tcga_pan_can_atlas_2018	TCGA-98-A53I-01	64	Male	SQ	-0.6767	0.3473	0.3812	0.7164	-0.2028	-0.7378	WT	White
405	luad_tcga_pan_can_atlas_2018	TCGA-L9-A8F4-01	64	Female	Ad	-1.0662	1.1662	-0.2244	1.8437	1.0419	-1.1262	WT	Black or African American
165	luad_tcga_pan_can_atlas_2018	TCGA-55-7728-01	64	Female	Ad	-0.1138	1.2273	-0.9521	-1.6328	0.4119	-1.297	WT	White
1317	lusc_tcga_pan_can_atlas_2018	TCGA-77-A5FZ-01	64	Male	SQ	1.5758	0.8585	-1.0689	-2.4841	-0.5443	-1.3497	WT
224	luad_tcga_pan_can_atlas_2018	TCGA-62-A471-01	64	Male	Ad	-1.8454	1.6633	1.4201	0.3335	-1.3822	-1.6827	WT	White
97	luad_tcga_pan_can_atlas_2018	TCGA-49-AAR2-01	64	Male	Ad	-2.6842	1.3655	-0.2635	-1.0125	-0.2775	-3.2933	WT	Black or African American
1104	lusc_tcga_pan_can_atlas_2018	TCGA-37-5819-01	64	Male	SQ	-1.0079	-1.0395	-0.3182	0.9332	2.3607	-4.0984	WT	White
497	luad_tcga_pan_can_atlas_2018	TCGA-J2-8192-01	65	Female	Ad	1.0177	-0.2098	-0.6776	-1.8692	-0.8812	1.3225	MUT	White
441	luad_tcga_pan_can_atlas_2018	TCGA-38-4628-01	65	Female	Ad	-0.0227	-0.9722	1.419	1.3708	0.5742	0.5745	MUT	White
463	luad_tcga_pan_can_atlas_2018	TCGA-62-8394-01	65	Female	Ad	-0.3082	0.3391	1.0371	-0.4693	-0.6018	0.5478	MUT	White
439	luad_tcga_pan_can_atlas_2018	TCGA-05-5423-01	65	Male	Ad	0.1999	-0.454	-1.0318	0.513	0.0473	0.3451	MUT
1447	lusc_tcga_pan_can_atlas_2018	TCGA-18-3417-01	65	Male	SQ	-0.2313	-0.8483	-0.5888	0.0194	1.2062	-0.2793	MUT
1478	lusc_tcga_pan_can_atlas_2018	TCGA-70-6723-01	65	Male	SQ	-2.7006	-0.9264	1.4167	-0.8026	-1.7898	2.877	WT	Asian
1470	lusc_tcga_pan_can_atlas_2018	TCGA-51-4080-01	65	Male	SQ	-1.6271	-1.4244	0.6719	1.6435	1.7788	2.3586	WT	Black or African American
42	luad_tcga_pan_can_atlas_2018	TCGA-44-2659-01	65	Female	Ad	0.3596	-0.5295	-1.1748	-0.0882	0.3895	1.8676	WT	White
1467	lusc_tcga_pan_can_atlas_2018	TCGA-37-3789-01	65	Male	SQ	1.0141	1.5009	1.4261	0.7296	0.8349	1.795	WT	White
1232	lusc_tcga_pan_can_atlas_2018	TCGA-63-A5MI-01	65	Male	SQ	-0.2684	-1.0292	1.6187	-0.2433	1.6212	1.1353	WT
259	luad_tcga_pan_can_atlas_2018	TCGA-73-4662-01	65	Female	Ad	-0.1125	-0.5336	-0.2486	-0.7806	-1.5744	0.7661	WT	White
217	luad_tcga_pan_can_atlas_2018	TCGA-62-A46O-01	65	Female	Ad	-3.3079	-0.5967	0.3234	0.9591	3.8691	0.562	WT	White
1299	lusc_tcga_pan_can_atlas_2018	TCGA-77-7337-01	65	Male	SQ	0.6984	-1.0238	0.0364	0.2449	-0.4885	0.5298	WT	White
344	luad_tcga_pan_can_atlas_2018	TCGA-91-6830-01	65	Female	Ad	-0.1016	-0.7965	-0.9213	0.917	-1.653	0.4914	WT	White
377	luad_tcga_pan_can_atlas_2018	TCGA-97-7937-01	65	Male	Ad	0.5976	-1.4936	-0.2217	-0.4329	-0.3678	0.4776	WT	White
20	luad_tcga_pan_can_atlas_2018	TCGA-05-4427-01	65	Female	Ad	0.1732	-0.2231	0.3229	0.3999	-1.2457	0.4757	WT
1112	lusc_tcga_pan_can_atlas_2018	TCGA-39-5024-01	65	Female	SQ	1.0022	1.1563	-1.0069	0.5418	0.1197	0.4166	WT	White
1267	lusc_tcga_pan_can_atlas_2018	TCGA-66-2780-01	65	Male	SQ	1.721	1.2001	-0.664	0.96	1.7219	0.3607	WT
43	luad_tcga_pan_can_atlas_2018	TCGA-44-2662-01	65	Male	Ad	1.3707	-0.237	0.7483	0.6234	0.9744	0.3182	WT	White
1359	lusc_tcga_pan_can_atlas_2018	TCGA-85-8666-01	65	Male	SQ	-0.6094	0.4394	2.0267	-0.7666	-1.1027	0.0945	WT	White
1046	lusc_tcga_pan_can_atlas_2018	TCGA-22-5477-01	65	Male	SQ	-0.6837	-1.6119	0.138	0.4316	-1.0309	0.0454	WT	White
1032	lusc_tcga_pan_can_atlas_2018	TCGA-22-1016-01	65	Male	SQ	0.98	0.1147	-0.5919	-1.2311	-0.5787	-0.2036	WT	White
1072	lusc_tcga_pan_can_atlas_2018	TCGA-33-AASI-01	65	Female	SQ	-0.232	0.2385	0.5223	-0.0482	1.1942	-0.3369	WT	Black or African American
1120	lusc_tcga_pan_can_atlas_2018	TCGA-39-5037-01	65	Male	SQ	-1.1837	-0.5172	0.8428	0.3462	0.9622	-0.4435	WT	White
1010	lusc_tcga_pan_can_atlas_2018	TCGA-18-3421-01	65	Male	SQ	0.7943	-0.3916	-0.5591	2.1171	2.1308	-0.5293	WT	White
424	luad_tcga_pan_can_atlas_2018	TCGA-NJ-A4YG-01	65	Male	Ad	0.1863	0.2708	-1.5388	0.5007	0.0761	-0.6341	WT	White
39	luad_tcga_pan_can_atlas_2018	TCGA-44-2655-01	65	Female	Ad	-0.7031	-0.0119	-0.6407	0.8403	-0.6999	-0.9189	WT	White
1271	lusc_tcga_pan_can_atlas_2018	TCGA-66-2785-01	65	Male	SQ	0.6763	1.6909	-0.7411	-0.8227	0.8512	-0.9971	WT
9	luad_tcga_pan_can_atlas_2018	TCGA-05-4397-01	65	Male	Ad	-0.5396	-0.5464	2.3632	2.0055	-1.1034	-1.1224	WT
286	luad_tcga_pan_can_atlas_2018	TCGA-78-7152-01	65	Male	Ad	0.123	0.4389	0.0493	-1.1666	0.6309	-1.138	WT	White
287	luad_tcga_pan_can_atlas_2018	TCGA-78-7153-01	65	Female	Ad	-1.3799	-0.8845	-0.2186	0.6806	-0.5052	-1.325	WT	White
218	luad_tcga_pan_can_atlas_2018	TCGA-62-A46P-01	65	Male	Ad	-0.9166	1.4636	-1.3951	-2.5258	-0.2036	-1.4231	WT	White
1360	lusc_tcga_pan_can_atlas_2018	TCGA-85-A4CL-01	65	Male	SQ	-0.7816	0.8082	-1.3146	0.1227	3.0874	-1.4686	WT	White
135	luad_tcga_pan_can_atlas_2018	TCGA-55-1592-01	65	Male	Ad	0.561	-0.6818	0.6766	0.2368	-0.5941	-1.8633	WT	White
1026	lusc_tcga_pan_can_atlas_2018	TCGA-21-5787-01	65	Male	SQ	0.1897	1.2479	0.6166	-0.4692	0.8948	-1.9436	WT	Black or African American
1253	lusc_tcga_pan_can_atlas_2018	TCGA-66-2757-01	65	Female	SQ	-0.5499	-0.4222	1.478	1.0178	-0.5502	-2.3285	WT
1103	lusc_tcga_pan_can_atlas_2018	TCGA-37-4141-01	65	Female	SQ	-0.3921	-0.91	2.1015	-0.1336	1.1418	-4.078	WT	White
481	luad_tcga_pan_can_atlas_2018	TCGA-86-8075-01	66	Female	Ad	0.8334	-0.3994	1.6097	-0.6129	-0.4005	1.1587	MUT	White
1019	lusc_tcga_pan_can_atlas_2018	TCGA-21-1080-01	66	Male	SQ	0.881	0.0296	-0.6264	0.4758	0.9604	0.8898	WT	White
1329	lusc_tcga_pan_can_atlas_2018	TCGA-85-6561-01	66	Male	SQ	0.574	0.2562	-1.2581	1.3439	-1.4391	0.8593	WT	White
1212	lusc_tcga_pan_can_atlas_2018	TCGA-60-2714-01	66	Female	SQ	1.2056	0.5885	0.3481	-1.8957	-0.2965	0.8473	WT	White
261	luad_tcga_pan_can_atlas_2018	TCGA-73-4668-01	66	Female	Ad	0.9455	-0.5325	0.343	0.1905	-1.1207	0.8293	WT	American Indian or Alaska Native
1255	lusc_tcga_pan_can_atlas_2018	TCGA-66-2759-01	66	Male	SQ	-0.282	-0.1685	-0.229	1.912	1.3103	0.7241	WT
1285	lusc_tcga_pan_can_atlas_2018	TCGA-68-8250-01	66	Male	SQ	0.2973	0.133	-0.0585	-0.1332	-0.2304	0.6128	WT	Black or African American
1320	lusc_tcga_pan_can_atlas_2018	TCGA-77-A5G6-01	66	Male	SQ	0.3535	-1.8661	0.002	1.4805	1.6874	0.4556	WT
345	luad_tcga_pan_can_atlas_2018	TCGA-91-6831-01	66	Male	Ad	0.1159	-0.0258	1.316	-0.9981	-0.3446	0.443	WT	White
1049	lusc_tcga_pan_can_atlas_2018	TCGA-22-5480-01	66	Female	SQ	0.3977	1.1515	0.0141	-0.3316	0.5598	0.3453	WT	White
1217	lusc_tcga_pan_can_atlas_2018	TCGA-60-2722-01	66	Male	SQ	-1.5251	0.4158	-1.082	0.0191	-0.6371	0.3288	WT	White
1175	lusc_tcga_pan_can_atlas_2018	TCGA-56-8309-01	66	Male	SQ	1.0368	1.1042	0.5059	-1.5089	-0.5652	0.3014	WT	White
22	luad_tcga_pan_can_atlas_2018	TCGA-05-4432-01	66	Male	Ad	-0.6241	0.6239	0.0973	0.3627	1.0684	0.3013	WT
302	luad_tcga_pan_can_atlas_2018	TCGA-78-7540-01	66	Female	Ad	-0.204	-1.7718	-2.0728	-0.2288	-1.1136	0.1856	WT	White
1277	lusc_tcga_pan_can_atlas_2018	TCGA-66-2791-01	66	Male	SQ	0.6804	0.2863	-0.3517	-0.1222	0.2408	0.1664	WT
1060	lusc_tcga_pan_can_atlas_2018	TCGA-33-4538-01	66	Male	SQ	-0.8296	-0.8662	-0.5606	-0.0927	-1.9577	0.0811	WT	White
1311	lusc_tcga_pan_can_atlas_2018	TCGA-77-8140-01	66	Female	SQ	-0.0059	-0.5426	0.3978	0.5263	0.8088	0.05	WT
1353	lusc_tcga_pan_can_atlas_2018	TCGA-85-8479-01	66	Male	SQ	0.6709	0.3591	0.4161	-0.945	-0.7912	0.0454	WT	White
1375	lusc_tcga_pan_can_atlas_2018	TCGA-90-7766-01	66	Female	SQ	0.0588	0.3277	0.5322	0.5211	-1.0876	0.0124	WT	White
33	luad_tcga_pan_can_atlas_2018	TCGA-38-4625-01	66	Female	Ad	1.7866	2.2895	0.4351	1.146	1.695	0.012	WT	White
1141	lusc_tcga_pan_can_atlas_2018	TCGA-43-A474-01	66	Male	SQ	-1.102	0.0712	0.1747	-0.8058	-0.6618	-0.0503	WT	White
1437	lusc_tcga_pan_can_atlas_2018	TCGA-NK-A7XE-01	66	Male	SQ	-0.1526	0.9427	-0.3151	0.4055	-0.5614	-0.2515	WT	Black or African American
1188	lusc_tcga_pan_can_atlas_2018	TCGA-56-A4BY-01	66	Male	SQ	0.256	-1.5088	0.8878	0.6222	0.6073	-0.2847	WT	White
398	luad_tcga_pan_can_atlas_2018	TCGA-J2-A4AG-01	66	Female	Ad	1.0711	-0.2061	-0.9235	-0.4874	-0.961	-0.359	WT	White
386	luad_tcga_pan_can_atlas_2018	TCGA-97-A4M2-01	66	Male	Ad	-0.2328	1.1024	-1.3607	-0.4442	-0.1007	-0.4239	WT	White
4	luad_tcga_pan_can_atlas_2018	TCGA-05-4384-01	66	Male	Ad	-0.0424	-0.624	-1.7376	0.1133	-0.0915	-0.4767	WT
258	luad_tcga_pan_can_atlas_2018	TCGA-73-4659-01	66	Male	Ad	0.7598	1.0652	0.7223	-0.5263	0.0218	-0.5809	WT	White
1181	lusc_tcga_pan_can_atlas_2018	TCGA-56-8625-01	66	Female	SQ	0.8393	0.6714	-0.3892	-0.0158	-0.9548	-0.7296	WT	White
1070	lusc_tcga_pan_can_atlas_2018	TCGA-33-AASB-01	66	Male	SQ	-1.3204	1.0921	-0.2542	1.6441	-1.1237	-0.7847	WT	Black or African American
1166	lusc_tcga_pan_can_atlas_2018	TCGA-56-7731-01	66	Female	SQ	1.0674	0.7585	-0.6879	-0.5758	0.7362	-0.8253	WT	White
316	luad_tcga_pan_can_atlas_2018	TCGA-86-7701-01	66	Male	Ad	-0.5956	-1.0265	0.5269	0.3813	-0.8102	-1.4382	WT	White
371	luad_tcga_pan_can_atlas_2018	TCGA-95-A4VP-01	66	Female	Ad	-1.4173	0.671	-0.6368	-1.2954	1.4684	-1.4647	WT	White
1161	lusc_tcga_pan_can_atlas_2018	TCGA-56-7223-01	66	Male	SQ	-2.2943	-3.7438	0.3959	1.2359	0.2719	-2.3947	WT	White
458	luad_tcga_pan_can_atlas_2018	TCGA-55-8096-01	67	Female	Ad	0.5081	-0.7975	-0.012	-0.8516	-0.0933	1.8934	MUT	White
476	luad_tcga_pan_can_atlas_2018	TCGA-78-7147-01	67	Female	Ad	0.5168	0.3044	0.7137	2.1393	0.7802	1.2201	MUT	White
444	luad_tcga_pan_can_atlas_2018	TCGA-44-A4SU-01	67	Female	Ad	0.4631	-1.2145	-0.9764	-0.2082	-0.0896	0.9871	MUT	White
447	luad_tcga_pan_can_atlas_2018	TCGA-49-4501-01	67	Female	Ad	0.3184	-0.0662	-1.2847	0.5673	0.4454	0.748	MUT	White
488	luad_tcga_pan_can_atlas_2018	TCGA-95-7947-01	67	Male	Ad	0.0841	-0.8819	1.9478	1.1219	-0.3992	-0.0583	MUT	White
1294	lusc_tcga_pan_can_atlas_2018	TCGA-77-7138-01	67	Male	SQ	0.4858	-0.7261	0.3042	1.8781	0.3127	1.7284	WT
120	luad_tcga_pan_can_atlas_2018	TCGA-50-5942-01	67	Female	Ad	1.8046	-2.0039	-1.7906	-0.3094	0.484	1.3695	WT	White
368	luad_tcga_pan_can_atlas_2018	TCGA-95-8494-01	67	Male	Ad	0.4842	0.5693	0.8173	0.4583	-0.567	0.8558	WT	White
1093	lusc_tcga_pan_can_atlas_2018	TCGA-34-8455-01	67	Male	SQ	1.944	0.9829	-1.2633	0.0141	-0.0996	0.7746	WT	White
1397	lusc_tcga_pan_can_atlas_2018	TCGA-96-8169-01	67	Female	SQ	1.1057	1.1452	-0.2379	0.1771	0.0814	0.6419	WT	White
1209	lusc_tcga_pan_can_atlas_2018	TCGA-60-2710-01	67	Female	SQ	0.3856	-0.1535	0.4703	0.8778	-0.2083	0.5649	WT	White
1404	lusc_tcga_pan_can_atlas_2018	TCGA-98-A538-01	67	Male	SQ	0.4287	0.6635	0.6077	0.4841	0.4414	0.5401	WT	White
2	luad_tcga_pan_can_atlas_2018	TCGA-05-4249-01	67	Male	Ad	0.3743	-1.0024	-0.9769	0.0247	0.384	0.5054	WT
1044	lusc_tcga_pan_can_atlas_2018	TCGA-22-5472-01	67	Male	SQ	1.2106	-0.2388	-1.0009	0.4462	0.1766	0.3924	WT	White
409	luad_tcga_pan_can_atlas_2018	TCGA-MP-A4SV-01	67	Male	Ad	0.6753	0.1805	0.828	0.621	-0.8845	0.3534	WT
1316	lusc_tcga_pan_can_atlas_2018	TCGA-77-8154-01	67	Male	SQ	-1.2173	0.0198	0.1072	-1.5968	0.0718	0.2878	WT
1114	lusc_tcga_pan_can_atlas_2018	TCGA-39-5029-01	67	Male	SQ	-0.1916	0.6448	0.2345	0.315	0.7372	0.2026	WT	White
373	luad_tcga_pan_can_atlas_2018	TCGA-97-7547-01	67	Female	Ad	1.1255	-0.8604	-2.3224	-0.7289	-0.1766	0.1603	WT	White
1142	lusc_tcga_pan_can_atlas_2018	TCGA-43-A475-01	67	Female	SQ	0.7543	1.9325	0.6209	-0.4769	-0.1496	0.1454	WT	White
1350	lusc_tcga_pan_can_atlas_2018	TCGA-85-8352-01	67	Male	SQ	-3.024	-1.6387	0.9892	0.0291	0.9417	0.1444	WT	White
24	luad_tcga_pan_can_atlas_2018	TCGA-05-4434-01	67	Female	Ad	-0.0652	0.5695	0.8634	1.1964	-0.9431	0.1342	WT
380	luad_tcga_pan_can_atlas_2018	TCGA-97-8174-01	67	Male	Ad	0.7166	-0.7044	-1.3672	-1.271	-1.3161	0.0646	WT	White
1068	lusc_tcga_pan_can_atlas_2018	TCGA-33-A5GW-01	67	Male	SQ	-0.3957	-0.1161	-1.6099	1.2154	0.1553	0.0042	WT	White
199	luad_tcga_pan_can_atlas_2018	TCGA-55-8615-01	67	Male	Ad	-2.5451	1.4952	0.2899	-0.9306	0.5537	-0.0634	WT	White
304	luad_tcga_pan_can_atlas_2018	TCGA-78-7633-01	67	Male	Ad	-0.757	-0.9229	-0.7538	0.004	-0.9688	-0.0788	WT	White
1366	lusc_tcga_pan_can_atlas_2018	TCGA-85-A4QR-01	67	Male	SQ	-0.9421	0.7264	0.3246	-0.026	-1.9571	-0.1578	WT	White
1268	lusc_tcga_pan_can_atlas_2018	TCGA-66-2781-01	67	Male	SQ	-0.7384	-0.8435	0.3188	0.7951	-1.1733	-0.1669	WT
1153	lusc_tcga_pan_can_atlas_2018	TCGA-52-7811-01	67	Male	SQ	0.2031	1.2561	0.5799	-0.5748	-1.7342	-0.1715	WT	White
143	luad_tcga_pan_can_atlas_2018	TCGA-55-6970-01	67	Female	Ad	0.3282	0.1722	0.1469	-0.1728	-0.7244	-0.2977	WT	White
1001	lusc_tcga_pan_can_atlas_2018	TCGA-18-3406-01	67	Male	SQ	1.0006	0.5327	-0.838	-0.2411	0.5049	-0.3096	WT	White
1014	lusc_tcga_pan_can_atlas_2018	TCGA-21-1071-01	67	Male	SQ	0.819	-0.3018	-0.656	0.8676	-0.6993	-0.3465	WT	White
1185	lusc_tcga_pan_can_atlas_2018	TCGA-56-A49D-01	67	Male	SQ	0.2587	0.7317	0.7198	0.8798	-0.0746	-0.3787	WT	White
400	luad_tcga_pan_can_atlas_2018	TCGA-L4-A4E6-01	67	Male	Ad	0.5108	1.2896	-1.3751	-1.4154	-0.3331	-0.4359	WT	White
1270	lusc_tcga_pan_can_atlas_2018	TCGA-66-2783-01	67	Male	SQ	0.3774	-0.2447	1.0411	1.7881	0.7764	-0.5551	WT
430	luad_tcga_pan_can_atlas_2018	TCGA-NJ-A55R-01	67	Male	Ad	-2.2696	-0.2868	0.358	-0.3019	0.3762	-0.8512	WT	White
1158	lusc_tcga_pan_can_atlas_2018	TCGA-56-6546-01	67	Male	SQ	0.6917	-0.1313	2.0653	-0.6116	2.2596	-2.1007	WT	White
1250	lusc_tcga_pan_can_atlas_2018	TCGA-66-2754-01	67	Male	SQ	-0.1012	-2.2917	0.8919	0.8988	-1.91	-3.5199	WT
436	luad_tcga_pan_can_atlas_2018	TCGA-05-4382-01	68	Male	Ad	0.1278	0.5953	0.2733	0.235	0.3072	-0.4061	MUT
477	luad_tcga_pan_can_atlas_2018	TCGA-78-7155-01	68	Male	Ad	-2.3569	-3.0378	2.8113	1.9282	-1.5366	-2.227	MUT	White
506	luad_tcga_pan_can_atlas_2018	TCGA-55-1594-01	68	Male	Ad	-1.2756	-1.0801	-0.351	1.6213	0.3565	2.8935	WT	White
93	luad_tcga_pan_can_atlas_2018	TCGA-49-6761-01	68	Female	Ad	-0.602	0.8586	0.811	1.2771	0.0714	1.9506	WT	White
1136	lusc_tcga_pan_can_atlas_2018	TCGA-43-7657-01	68	Female	SQ	-0.6523	-0.4975	-0.0922	-0.5918	-0.9962	1.6606	WT	White
1304	lusc_tcga_pan_can_atlas_2018	TCGA-77-8008-01	68	Male	SQ	0.9259	1.4212	-1.6427	-1.2827	0.2433	1.1845	WT
1483	lusc_tcga_pan_can_atlas_2018	TCGA-77-8148-01	68	Male	SQ	-0.6646	-0.1398	0.6699	0.6269	0.0824	1.0233	WT
1305	lusc_tcga_pan_can_atlas_2018	TCGA-77-8009-01	68	Male	SQ	-0.3313	0.418	1.995	-0.1365	1.513	0.8412	WT
1178	lusc_tcga_pan_can_atlas_2018	TCGA-56-8622-01	68	Male	SQ	-0.2352	1.2904	-2.8439	-1.7796	1.3658	0.5605	WT	White
162	luad_tcga_pan_can_atlas_2018	TCGA-55-7725-01	68	Female	Ad	0.6202	-2.4069	-0.5207	1.0255	-1.1748	0.4565	WT	White
1365	lusc_tcga_pan_can_atlas_2018	TCGA-85-A4QQ-01	68	Male	SQ	-0.2379	2.5741	-0.62	-0.5285	0.2869	0.3193	WT	White
1280	lusc_tcga_pan_can_atlas_2018	TCGA-66-2795-01	68	Male	SQ	0.1501	-0.1085	-0.4866	0.5895	0.8051	0.2877	WT
411	luad_tcga_pan_can_atlas_2018	TCGA-MP-A4T4-01	68	Female	Ad	0.1307	1.005	0.259	0.2062	0.2256	0.284	WT	White
1198	lusc_tcga_pan_can_atlas_2018	TCGA-58-8393-01	68	Female	SQ	0.5487	0.0191	-2.0004	1.1756	0.0585	0.2495	WT	White
1416	lusc_tcga_pan_can_atlas_2018	TCGA-LA-A446-01	68	Male	SQ	-1.1334	-1.0612	0.0603	1.1759	-1.079	0.1123	WT	White
1303	lusc_tcga_pan_can_atlas_2018	TCGA-77-8007-01	68	Male	SQ	1.2678	0.3138	-0.0416	-1.8854	-0.5311	0.0992	WT
1230	lusc_tcga_pan_can_atlas_2018	TCGA-63-A5MG-01	68	Male	SQ	0.4281	0.8724	-1.1136	0.3049	-0.22	0.0892	WT
1423	lusc_tcga_pan_can_atlas_2018	TCGA-NC-A5HI-01	68	Female	SQ	0.6254	-0.0934	0.8158	1.0647	-0.4684	0.069	WT	White
25	luad_tcga_pan_can_atlas_2018	TCGA-05-5425-01	68	Male	Ad	0.3693	0.2339	0.5074	0.7789	-0.5913	0.0339	WT
1022	lusc_tcga_pan_can_atlas_2018	TCGA-21-5782-01	68	Female	SQ	-0.1283	0.0495	1.9391	0.8365	0.9798	-0.0003	WT	White
1231	lusc_tcga_pan_can_atlas_2018	TCGA-63-A5MH-01	68	Male	SQ	-0.5471	0.6446	1.0442	0.2619	0.1618	-0.094	WT
104	luad_tcga_pan_can_atlas_2018	TCGA-49-AARR-01	68	Male	Ad	0.1992	1.0349	-1.6277	-1.2051	0.6556	-0.1301	WT	Black or African American
1272	lusc_tcga_pan_can_atlas_2018	TCGA-66-2786-01	68	Female	SQ	1.2222	0.014	-0.6719	0.6556	0.8189	-0.2039	WT
321	luad_tcga_pan_can_atlas_2018	TCGA-86-7954-01	68	Female	Ad	0.2143	1.2423	0.2071	-0.053	-0.6364	-0.2265	WT	White
1154	lusc_tcga_pan_can_atlas_2018	TCGA-52-7812-01	68	Male	SQ	1.4488	0.0519	1.6996	0.196	-0.6634	-0.24	WT	White
1058	lusc_tcga_pan_can_atlas_2018	TCGA-33-4532-01	68	Male	SQ	-0.2419	-1.5112	1.1017	0.4278	0.5778	-0.2905	WT	White
1234	lusc_tcga_pan_can_atlas_2018	TCGA-63-A5ML-01	68	Male	SQ	-0.4891	-0.0939	0.1705	2.4105	-2.0785	-0.3084	WT
1061	lusc_tcga_pan_can_atlas_2018	TCGA-33-4547-01	68	Male	SQ	0.9763	-0.336	0.5448	0.0882	-0.859	-0.3377	WT	White
129	luad_tcga_pan_can_atlas_2018	TCGA-50-8459-01	68	Male	Ad	-0.0207	0.9462	-0.4475	-1.7088	0.8494	-0.4206	WT	White
413	luad_tcga_pan_can_atlas_2018	TCGA-MP-A4T8-01	68	Male	Ad	-1.1871	0.1106	-0.0862	-1.4217	-1.1704	-0.4937	WT
16	luad_tcga_pan_can_atlas_2018	TCGA-05-4422-01	68	Male	Ad	-0.6547	0.7559	0.2215	0.3741	-0.0888	-0.6477	WT
1278	lusc_tcga_pan_can_atlas_2018	TCGA-66-2793-01	68	Male	SQ	-1.0658	-2.4318	-0.2743	0.8787	0.6347	-0.6921	WT
433	luad_tcga_pan_can_atlas_2018	TCGA-S2-AA1A-01	68	Female	Ad	-0.4183	-0.2553	-1.4237	-0.9827	0.9139	-0.7046	WT	Black or African American
1252	lusc_tcga_pan_can_atlas_2018	TCGA-66-2756-01	68	Male	SQ	-0.9908	-0.9837	-0.4043	0.4474	-0.0031	-0.961	WT
1266	lusc_tcga_pan_can_atlas_2018	TCGA-66-2778-01	68	Female	SQ	0.4856	0.6324	0.3263	1.7245	1.0618	-1.0982	WT
84	luad_tcga_pan_can_atlas_2018	TCGA-49-4506-01	68	Female	Ad	-0.6979	1.4279	-0.067	0.9507	2.4195	-1.1713	WT	White
1102	lusc_tcga_pan_can_atlas_2018	TCGA-37-4135-01	68	Male	SQ	-0.1609	-0.1111	2.6687	1.0696	1.1954	-2.8548	WT	White
449	luad_tcga_pan_can_atlas_2018	TCGA-50-5944-01	69	Female	Ad	1.1798	-1.587	-0.5918	-1.0675	-1.5119	1.3104	MUT	White
1293	lusc_tcga_pan_can_atlas_2018	TCGA-77-6845-01	69	Male	SQ	-1.5512	-2.6079	1.0132	-0.1433	-0.0948	1.4675	WT	White
404	luad_tcga_pan_can_atlas_2018	TCGA-L9-A7SV-01	69	Male	Ad	-1.2527	-0.1252	-0.2203	0.7871	0.2375	0.895	WT	Black or African American
1430	lusc_tcga_pan_can_atlas_2018	TCGA-NC-A5HP-01	69	Male	SQ	0.6328	-0.8894	-1.8313	1.642	-1.2426	0.8014	WT	White
65	luad_tcga_pan_can_atlas_2018	TCGA-44-7661-01	69	Female	Ad	0.7259	0.811	1.1896	-0.172	-0.4359	0.7566	WT	White
1028	lusc_tcga_pan_can_atlas_2018	TCGA-22-1002-01	69	Male	SQ	0.7739	-0.694	-0.5989	0.7587	-0.0092	0.6692	WT	White
1020	lusc_tcga_pan_can_atlas_2018	TCGA-21-1081-01	69	Male	SQ	-1.1404	-0.3316	1.0661	1.4878	1.3333	0.6691	WT	White
1249	lusc_tcga_pan_can_atlas_2018	TCGA-66-2753-01	69	Male	SQ	0.8811	-0.9593	0.003	-1.1282	-1.1979	0.6343	WT
87	luad_tcga_pan_can_atlas_2018	TCGA-49-4512-01	69	Female	Ad	-0.4837	-0.5757	-1.3314	-0.207	0.3923	0.5777	WT	White
1131	lusc_tcga_pan_can_atlas_2018	TCGA-43-6647-01	69	Female	SQ	0.7303	-0.0147	-1.7559	-2.235	-0.0697	0.4531	WT	White
240	luad_tcga_pan_can_atlas_2018	TCGA-67-4679-01	69	Male	Ad	0.8659	-1.4405	-0.5638	-0.2493	0.4218	0.2972	WT	White
320	luad_tcga_pan_can_atlas_2018	TCGA-86-7953-01	69	Female	Ad	0.7055	-0.0126	0.5961	0.36	-0.5927	0.2456	WT	White
299	luad_tcga_pan_can_atlas_2018	TCGA-78-7536-01	69	Male	Ad	0.5372	-1.3039	0.8418	0.8257	-1.951	0.2232	WT	White
1235	lusc_tcga_pan_can_atlas_2018	TCGA-63-A5MM-01	69	Female	SQ	1.3662	0.8607	0.2299	-0.9993	2.545	0.1868	WT
262	luad_tcga_pan_can_atlas_2018	TCGA-73-4670-01	69	Female	Ad	-0.9025	0.8606	0.2789	0.1613	-0.0883	0.1248	WT	White
1379	lusc_tcga_pan_can_atlas_2018	TCGA-90-A4ED-01	69	Male	SQ	-1.1498	-0.8216	-1.3259	-3.096	0.1621	0.0977	WT	White
1296	lusc_tcga_pan_can_atlas_2018	TCGA-77-7140-01	69	Female	SQ	-1.7207	-1.9669	1.3471	-0.6561	0.2128	0.0638	WT	White
1433	lusc_tcga_pan_can_atlas_2018	TCGA-NC-A5HT-01	69	Male	SQ	-0.8902	-1.2804	0.0443	-1.1842	-1.1062	-0.0553	WT	White
1306	lusc_tcga_pan_can_atlas_2018	TCGA-77-8130-01	69	Male	SQ	-0.0757	1.1516	-0.582	-1.6907	0.778	-0.0665	WT
28	luad_tcga_pan_can_atlas_2018	TCGA-05-5715-01	69	Female	Ad	0.2947	-0.4044	-0.9529	-0.1086	-0.2457	-0.0751	WT
1242	lusc_tcga_pan_can_atlas_2018	TCGA-63-A5MV-01	69	Male	SQ	-0.0465	0.1544	-1.1408	-0.4928	0.5981	-0.1155	WT
395	luad_tcga_pan_can_atlas_2018	TCGA-J2-8194-01	69	Female	Ad	0.474	1.0243	-1.483	-1.482	-0.8225	-0.1171	WT	White
1407	lusc_tcga_pan_can_atlas_2018	TCGA-98-A53B-01	69	Male	SQ	-0.6822	0.2437	-0.4809	-0.748	0.3206	-0.1712	WT	White
1037	lusc_tcga_pan_can_atlas_2018	TCGA-22-4596-01	69	Female	SQ	1.3024	0.9598	-0.9588	-1.6742	-0.2715	-0.2514	WT	White
183	luad_tcga_pan_can_atlas_2018	TCGA-55-8203-01	69	Female	Ad	-0.459	0.2945	-0.0699	-1.0787	-0.37	-0.2905	WT	White
205	luad_tcga_pan_can_atlas_2018	TCGA-55-A48Y-01	69	Male	Ad	-0.8896	0.5585	0.1171	2.013	-0.4633	-0.2935	WT	White
1264	lusc_tcga_pan_can_atlas_2018	TCGA-66-2773-01	69	Male	SQ	0.744	0.4316	-0.8853	1.0528	0.416	-0.3163	WT
1157	lusc_tcga_pan_can_atlas_2018	TCGA-56-5898-01	69	Male	SQ	-0.1866	0.3671	-0.273	0.0991	0.4644	-0.3576	WT	White
14	luad_tcga_pan_can_atlas_2018	TCGA-05-4418-01	69	Male	Ad	-0.7731	0.0415	0.7277	0.1411	2.0241	-0.4174	WT
1208	lusc_tcga_pan_can_atlas_2018	TCGA-60-2709-01	69	Male	SQ	0.7415	0.4991	-0.4912	-0.3784	0.7116	-0.4498	WT	Black or African American
308	luad_tcga_pan_can_atlas_2018	TCGA-78-8660-01	69	Male	Ad	-0.2634	1.3849	0.1027	0.0103	0.8986	-0.5518	WT
1097	lusc_tcga_pan_can_atlas_2018	TCGA-37-3792-01	69	Male	SQ	2.8034	0.6133	1.4599	-0.3879	1.2275	-0.5563	WT	White
98	luad_tcga_pan_can_atlas_2018	TCGA-49-AAR3-01	69	Male	Ad	0.3241	1.4141	0.6782	-0.5394	-0.8122	-0.6014	WT	Black or African American
292	luad_tcga_pan_can_atlas_2018	TCGA-78-7161-01	69	Female	Ad	-1.9517	0.0879	-0.4919	-1.3555	0.239	-0.7673	WT	White
427	luad_tcga_pan_can_atlas_2018	TCGA-NJ-A4YQ-01	69	Female	Ad	0.0969	1.2773	0.8314	0.4885	-0.0761	-0.9461	WT	White
387	luad_tcga_pan_can_atlas_2018	TCGA-97-A4M3-01	69	Female	Ad	-1.934	-0.0978	-1.4408	1.5805	0.6127	-1.0391	WT	White
30	luad_tcga_pan_can_atlas_2018	TCGA-35-4122-01	69	Male	Ad	0.7698	0.8249	1.4266	2.1531	1.138	-1.4488	WT	White
442	luad_tcga_pan_can_atlas_2018	TCGA-38-6178-01	70	Female	Ad	1.128	-0.4729	-0.5105	-0.4738	-0.537	2.5882	MUT	White
1457	lusc_tcga_pan_can_atlas_2018	TCGA-66-2742-01	70	Male	SQ	2.427	-0.653	-0.1346	0.3122	1.4365	0.9466	MUT
467	luad_tcga_pan_can_atlas_2018	TCGA-67-3770-01	70	Female	Ad	-0.061	-0.1118	-0.4762	-1.0971	0.0046	0.4981	MUT	White
1473	lusc_tcga_pan_can_atlas_2018	TCGA-58-8392-01	70	Male	SQ	-0.9458	-1.8459	0.3122	0.12	-1.5156	2.2115	WT	White
214	luad_tcga_pan_can_atlas_2018	TCGA-62-8397-01	70	Female	Ad	2.2988	-0.8053	-1.1675	-1.2757	-1.6389	1.7423	WT	White
1075	lusc_tcga_pan_can_atlas_2018	TCGA-34-2596-01	70	Male	SQ	-0.8317	-1.0861	0.5082	1.899	0.2496	1.0851	WT	White
1187	lusc_tcga_pan_can_atlas_2018	TCGA-56-A4BX-01	70	Male	SQ	-3.0178	-0.8187	-1.1722	-1.2519	-1.6734	0.8708	WT	White
1	luad_tcga_pan_can_atlas_2018	TCGA-05-4244-01	70	Male	Ad	0.756	0.0346	0.2288	0.303	0.7099	0.8652	WT
318	luad_tcga_pan_can_atlas_2018	TCGA-86-7713-01	70	Male	Ad	0.0811	0.1807	1.2313	-1.4372	-1.1428	0.8226	WT	White
63	luad_tcga_pan_can_atlas_2018	TCGA-44-7659-01	70	Male	Ad	0.3471	-0.0579	-0.7457	-0.3135	0.1925	0.6461	WT	White
1348	lusc_tcga_pan_can_atlas_2018	TCGA-85-8288-01	70	Male	SQ	-0.138	-0.1729	1.1791	0.0802	-0.5254	0.6418	WT	White
1312	lusc_tcga_pan_can_atlas_2018	TCGA-77-8144-01	70	Male	SQ	0.1902	-0.4153	-1.1385	0.7024	1.8546	0.6016	WT
1322	lusc_tcga_pan_can_atlas_2018	TCGA-77-A5G8-01	70	Male	SQ	0.233	0.9442	-1.1303	0.7754	-0.4363	0.5742	WT
1091	lusc_tcga_pan_can_atlas_2018	TCGA-34-7107-01	70	Male	SQ	-0.7457	0.034	-0.8002	0.4941	-1.5217	0.5298	WT	White
1238	lusc_tcga_pan_can_atlas_2018	TCGA-63-A5MR-01	70	Female	SQ	0.3421	1.8686	-0.9844	0.2189	1.1778	0.5109	WT
1403	lusc_tcga_pan_can_atlas_2018	TCGA-98-8023-01	70	Male	SQ	0.189	1.4301	0.097	-0.9977	-0.305	0.494	WT	White
1207	lusc_tcga_pan_can_atlas_2018	TCGA-60-2707-01	70	Male	SQ	1.8029	1.0748	-1.3417	-1.0805	-0.8831	0.4916	WT
1130	lusc_tcga_pan_can_atlas_2018	TCGA-43-6143-01	70	Male	SQ	-0.6202	-0.9426	2.2695	1.6487	0.424	0.4678	WT	White
225	luad_tcga_pan_can_atlas_2018	TCGA-62-A472-01	70	Male	Ad	0.7924	0.5667	-0.4447	0.57	-1.5012	0.4352	WT	White
1390	lusc_tcga_pan_can_atlas_2018	TCGA-94-8490-01	70	Male	SQ	-2.976	0.2471	-1.29	1.7804	-2.45	0.3814	WT	White
1406	lusc_tcga_pan_can_atlas_2018	TCGA-98-A53A-01	70	Male	SQ	-1.0941	-1.194	-0.0698	1.9339	-0.0034	0.3737	WT	Black or African American
164	luad_tcga_pan_can_atlas_2018	TCGA-55-7727-01	70	Male	Ad	0.838	-1.3166	0.9861	0.9324	-1.856	0.309	WT	White
222	luad_tcga_pan_can_atlas_2018	TCGA-62-A46Y-01	70	Female	Ad	1.3727	0.3622	-0.2962	-0.0601	0.5418	0.3067	WT	White
1354	lusc_tcga_pan_can_atlas_2018	TCGA-85-8481-01	70	Male	SQ	1.2192	1.2383	-0.3629	-3.1493	-0.1158	0.1958	WT	White
1057	lusc_tcga_pan_can_atlas_2018	TCGA-22-A5C4-01	70	Male	SQ	0.3263	-1.2378	0.3832	-1.3103	-0.4244	0.1611	WT	White
1088	lusc_tcga_pan_can_atlas_2018	TCGA-34-5927-01	70	Female	SQ	-0.0488	-1.9406	0.7302	1.3905	-0.1297	0.1403	WT	White
374	luad_tcga_pan_can_atlas_2018	TCGA-97-7552-01	70	Male	Ad	0.8702	-0.3311	-0.6836	-0.9409	-1.1772	0.1114	WT	White
342	luad_tcga_pan_can_atlas_2018	TCGA-91-6828-01	70	Male	Ad	0.5033	-0.2033	0.3148	0.0663	-1.6906	0.0927	WT	White
18	luad_tcga_pan_can_atlas_2018	TCGA-05-4425-01	70	Female	Ad	1.0488	0.3746	0.0325	0.1503	0.6302	0.0565	WT
508	luad_tcga_pan_can_atlas_2018	TCGA-55-8514-01	70	Female	Ad	0.2397	1.3461	-1.8935	-1.5803	-0.2506	0.0044	WT	Black or African American
1196	lusc_tcga_pan_can_atlas_2018	TCGA-58-8390-01	70	Male	SQ	-0.8535	0.277	0.6822	-0.3145	-0.558	-0.0209	WT	White
250	luad_tcga_pan_can_atlas_2018	TCGA-69-7980-01	70	Female	Ad	0.0521	-0.1171	1.8482	0.6943	0.1604	-0.059	WT	White
1109	lusc_tcga_pan_can_atlas_2018	TCGA-39-5019-01	70	Male	SQ	0.1423	-0.0881	0.3729	-0.8739	0.2716	-0.0615	WT	White
418	luad_tcga_pan_can_atlas_2018	TCGA-MP-A4TH-01	70	Female	Ad	-0.6899	-0.2243	-1.6779	-0.7388	-0.0895	-0.0782	WT	White
1378	lusc_tcga_pan_can_atlas_2018	TCGA-90-7964-01	70	Male	SQ	0.0581	0.291	-0.3043	-0.8751	1.1679	-0.1191	WT	White
317	luad_tcga_pan_can_atlas_2018	TCGA-86-7711-01	70	Male	Ad	0.3569	0.4059	1.0491	1.177	-0.4688	-0.1282	WT	White
1129	lusc_tcga_pan_can_atlas_2018	TCGA-43-5670-01	70	Male	SQ	0.0115	0.7714	0.3735	-1.2477	1.0277	-0.2058	WT	White
394	luad_tcga_pan_can_atlas_2018	TCGA-99-AA5R-01	70	Female	Ad	0.3812	-0.2277	-0.8978	-1.7086	1.0888	-0.2392	WT	Black or African American
17	luad_tcga_pan_can_atlas_2018	TCGA-05-4424-01	70	Male	Ad	0.3985	-0.7684	0.9646	0.818	-0.0441	-0.3359	WT
171	luad_tcga_pan_can_atlas_2018	TCGA-55-7911-01	70	Female	Ad	0.912	0.4199	0.8794	0.6928	0.368	-0.3503	WT	White
1346	lusc_tcga_pan_can_atlas_2018	TCGA-85-8277-01	70	Male	SQ	-0.8181	-0.3404	0.1954	-0.2403	-1.4941	-0.4813	WT	White
1431	lusc_tcga_pan_can_atlas_2018	TCGA-NC-A5HQ-01	70	Male	SQ	1.1993	0.8926	0.0965	0.5975	0.4078	-0.5197	WT	White
360	luad_tcga_pan_can_atlas_2018	TCGA-93-A4JO-01	70	Male	Ad	0.7415	1.1809	0.2987	-0.5229	1.077	-0.556	WT	White
1324	lusc_tcga_pan_can_atlas_2018	TCGA-77-A5GF-01	70	Male	SQ	-1.2168	0.2944	0.2717	0.0345	-0.2091	-0.5704	WT
1281	lusc_tcga_pan_can_atlas_2018	TCGA-66-2800-01	70	Male	SQ	0.5102	-0.4065	0.8476	0.0182	1.8651	-0.6542	WT
89	luad_tcga_pan_can_atlas_2018	TCGA-49-6742-01	70	Male	Ad	-1.0177	-0.4906	0.9277	0.5002	0.1654	-0.7202	WT	White
1429	lusc_tcga_pan_can_atlas_2018	TCGA-NC-A5HO-01	70	Female	SQ	-0.645	0.3508	-0.8695	-0.6021	-1.0766	-0.757	WT	White
156	luad_tcga_pan_can_atlas_2018	TCGA-55-7281-01	70	Female	Ad	1.0209	0.6275	-0.3343	-0.6559	0.4204	-0.8306	WT	White
1435	lusc_tcga_pan_can_atlas_2018	TCGA-NK-A5CT-01	70	Male	SQ	0.612	-0.045	-1.3263	-0.4571	0.4584	-0.9563	WT	White
108	luad_tcga_pan_can_atlas_2018	TCGA-50-5049-01	70	Male	Ad	0.8253	1.1502	0.6788	-0.0508	1.4285	-0.9599	WT	White
5	luad_tcga_pan_can_atlas_2018	TCGA-05-4389-01	70	Male	Ad	-0.2424	0.5499	0.8146	1.4855	1.0884	-1.1105	WT
1413	lusc_tcga_pan_can_atlas_2018	TCGA-J1-A4AH-01	70	Male	SQ	-1.6673	-1.4929	-0.114	0.273	0.2689	-1.3087	WT	White
1110	lusc_tcga_pan_can_atlas_2018	TCGA-39-5021-01	70	Male	SQ	0.0557	-0.069	1.6355	0.1106	0.4736	-1.4535	WT	White
1107	lusc_tcga_pan_can_atlas_2018	TCGA-39-5011-01	70	Female	SQ	1.9912	0.9061	0.2313	-1.6996	0.384	-2.0654	WT	White
208	luad_tcga_pan_can_atlas_2018	TCGA-55-A492-01	70	Female	Ad	-1.7932	1.2573	-2.2482	0.0591	0.6212	-2.1338	WT	White
228	luad_tcga_pan_can_atlas_2018	TCGA-64-1678-01	70	Female	Ad	-2.6241	-2.1388	1.1085	0.096	1.6939	-2.3074	WT	White
465	luad_tcga_pan_can_atlas_2018	TCGA-62-A46U-01	71	Female	Ad	0.7882	1.7642	0.777	-0.5131	-0.4246	0.9328	MUT	White
1469	lusc_tcga_pan_can_atlas_2018	TCGA-46-6025-01	71	Male	SQ	0.496	1.0794	-0.0698	-0.6642	0.7979	1.6201	WT	White
253	luad_tcga_pan_can_atlas_2018	TCGA-69-8255-01	71	Male	Ad	0.899	-0.1874	1.7636	1.8329	-0.068	1.1116	WT	White
282	luad_tcga_pan_can_atlas_2018	TCGA-78-7146-01	71	Female	Ad	0.4117	-0.0207	0.726	2.5997	-0.8944	1.0848	WT	White
212	luad_tcga_pan_can_atlas_2018	TCGA-55-A4DG-01	71	Male	Ad	1.1455	-0.7522	-1.2117	-0.2808	-0.5514	0.8377	WT	White
141	luad_tcga_pan_can_atlas_2018	TCGA-55-6712-01	71	Male	Ad	1.5592	-0.6916	-0.2901	-1.4243	-1.3925	0.8191	WT	White
365	luad_tcga_pan_can_atlas_2018	TCGA-95-7944-01	71	Male	Ad	-0.3107	1.2302	0.8296	0.5032	0.091	0.8124	WT	White
1383	lusc_tcga_pan_can_atlas_2018	TCGA-92-7341-01	71	Male	SQ	-0.647	-0.3762	0.2243	-0.9643	0.0312	0.7638	WT	White
1337	lusc_tcga_pan_can_atlas_2018	TCGA-85-7844-01	71	Male	SQ	1.0861	-0.8442	0.0825	1.308	-0.3693	0.6943	WT	White
363	luad_tcga_pan_can_atlas_2018	TCGA-95-7562-01	71	Male	Ad	0.9404	-0.5222	2.0417	1.6019	-0.5949	0.6754	WT	Black or African American
1018	lusc_tcga_pan_can_atlas_2018	TCGA-21-1079-01	71	Male	SQ	-0.3535	0.2377	0.129	-1.3238	0.0623	0.6466	WT	White
1488	lusc_tcga_pan_can_atlas_2018	TCGA-LA-A7SW-01	71	Male	SQ	-1.0501	0.4304	-0.3081	-2.4081	-2.5328	0.5618	WT	Black or African American
1392	lusc_tcga_pan_can_atlas_2018	TCGA-94-A4VJ-01	71	Female	SQ	0.1538	1.1639	0.6342	0.6599	0.2805	0.4705	WT	White
1269	lusc_tcga_pan_can_atlas_2018	TCGA-66-2782-01	71	Male	SQ	1.8973	1.4717	-0.4562	0.1552	1.1802	0.4441	WT
1265	lusc_tcga_pan_can_atlas_2018	TCGA-66-2777-01	71	Male	SQ	0.4002	0.3152	-0.2932	0.6088	-0.2674	0.4024	WT
19	luad_tcga_pan_can_atlas_2018	TCGA-05-4426-01	71	Male	Ad	1.1341	0.4318	-0.0905	-0.4449	1.7281	0.3978	WT
1414	lusc_tcga_pan_can_atlas_2018	TCGA-L3-A4E7-01	71	Male	SQ	0.8723	0.4547	-0.6484	-0.5938	0.0006	0.2447	WT	White
1094	lusc_tcga_pan_can_atlas_2018	TCGA-34-8456-01	71	Female	SQ	-0.8937	-1.2244	-0.8377	-1.0178	-0.5626	0.1714	WT	White
1248	lusc_tcga_pan_can_atlas_2018	TCGA-66-2744-01	71	Male	SQ	0.8406	0.5424	0.7832	-0.5167	0.3391	0.119	WT
249	luad_tcga_pan_can_atlas_2018	TCGA-69-7979-01	71	Female	Ad	0.8392	-0.7374	-0.165	-0.5059	1.1513	0.1009	WT	White
232	luad_tcga_pan_can_atlas_2018	TCGA-64-5775-01	71	Male	Ad	0.4063	-1.1573	1.506	0.1166	3.1216	0.0448	WT	White
173	luad_tcga_pan_can_atlas_2018	TCGA-55-7914-01	71	Female	Ad	-0.9596	0.9172	-0.5856	0.5474	0.5103	-0.0189	WT	White
50	luad_tcga_pan_can_atlas_2018	TCGA-44-3919-01	71	Female	Ad	0.8763	-0.1799	0.6166	0.1349	-0.3738	-0.0386	WT	White
359	luad_tcga_pan_can_atlas_2018	TCGA-93-A4JN-01	71	Male	Ad	-0.3835	-0.7281	2.0748	0.716	-0.2612	-0.2587	WT	White
283	luad_tcga_pan_can_atlas_2018	TCGA-78-7148-01	71	Male	Ad	-0.1238	-0.1997	0.6941	-0.5055	0.3553	-0.2766	WT	White
1135	lusc_tcga_pan_can_atlas_2018	TCGA-43-7656-01	71	Male	SQ	-0.7423	0.2143	0.3395	-0.2413	0.1886	-0.2904	WT	White
123	luad_tcga_pan_can_atlas_2018	TCGA-50-6592-01	71	Female	Ad	0.4918	0.4876	1.0018	0.7654	1.0735	-0.3317	WT	White
151	luad_tcga_pan_can_atlas_2018	TCGA-55-6984-01	71	Female	Ad	-0.4369	-0.032	-0.7043	1.6016	-0.9293	-0.5567	WT	White
1442	lusc_tcga_pan_can_atlas_2018	TCGA-O2-A5IB-01	71	Female	SQ	-1.2082	-2.3954	3.3513	1.2152	-0.5019	-0.9232	WT	White
416	luad_tcga_pan_can_atlas_2018	TCGA-MP-A4TD-01	71	Male	Ad	-1.4006	0.4716	-0.5214	-0.6807	0.9491	-1.0884	WT	White
1342	lusc_tcga_pan_can_atlas_2018	TCGA-85-8070-01	71	Male	SQ	-3.6742	-1.5501	0.3807	-1.1165	-0.2403	-1.1564	WT	White
1127	lusc_tcga_pan_can_atlas_2018	TCGA-43-3920-01	71	Male	SQ	1.1908	0.026	-0.3851	0.7775	1.6173	-1.1841	WT	White
1083	lusc_tcga_pan_can_atlas_2018	TCGA-34-5234-01	71	Female	SQ	0.8361	0.5943	-1.0322	-0.7733	1.4717	-1.306	WT	White
284	luad_tcga_pan_can_atlas_2018	TCGA-78-7149-01	71	Male	Ad	-1.5803	-0.3381	-1.8717	-0.607	-0.9901	-1.458	WT	White
1254	lusc_tcga_pan_can_atlas_2018	TCGA-66-2758-01	71	Male	SQ	0.0067	-0.076	-0.1997	-0.067	1.2396	-1.4581	WT
1357	lusc_tcga_pan_can_atlas_2018	TCGA-85-8584-01	71	Male	SQ	-0.2682	0.4284	-0.3017	-1.4324	1.6394	-1.8705	WT	White
457	luad_tcga_pan_can_atlas_2018	TCGA-55-7573-01	72	Female	Ad	1.4194	-0.834	-1.8182	-1.746	0.3034	0.6322	MUT	White
448	luad_tcga_pan_can_atlas_2018	TCGA-50-5066-01	72	Male	Ad	0.9869	0.594	1.8826	1.6507	2.5698	-2.0108	MUT	Black or African American
1484	lusc_tcga_pan_can_atlas_2018	TCGA-85-8351-01	72	Male	SQ	0.818	-0.658	-0.4502	-0.0074	1.2853	3.2537	WT	White
163	luad_tcga_pan_can_atlas_2018	TCGA-55-7726-01	72	Female	Ad	0.3942	-0.741	1.3485	1.048	-0.7986	1.8581	WT	White
116	luad_tcga_pan_can_atlas_2018	TCGA-50-5933-01	72	Male	Ad	0.5911	-0.5024	0.5153	0.5144	-0.9023	1.7312	WT	White
122	luad_tcga_pan_can_atlas_2018	TCGA-50-6590-01	72	Female	Ad	0.1002	1.0322	1.0971	1.4815	-0.6438	1.3073	WT	White
1347	lusc_tcga_pan_can_atlas_2018	TCGA-85-8287-01	72	Male	SQ	0.3585	0.156	-0.593	-1.3173	-0.965	1.1792	WT	White
1081	lusc_tcga_pan_can_atlas_2018	TCGA-34-5231-01	72	Male	SQ	-0.1205	1.1225	1.0388	0.0167	1.1709	1.1778	WT	White
58	luad_tcga_pan_can_atlas_2018	TCGA-44-6775-01	72	Female	Ad	0.631	-0.2634	0.8696	0.0007	-0.394	0.8609	WT	White
1276	lusc_tcga_pan_can_atlas_2018	TCGA-66-2790-01	72	Male	SQ	-0.0929	0.1302	0.2944	0.7366	-0.1148	0.7734	WT
1310	lusc_tcga_pan_can_atlas_2018	TCGA-77-8139-01	72	Male	SQ	-1.4796	-0.1936	1.6315	-0.3149	-0.1561	0.2417	WT
367	luad_tcga_pan_can_atlas_2018	TCGA-95-8039-01	72	Male	Ad	0.521	-0.0563	-0.0396	0.2115	-0.929	0.1651	WT	White
1002	lusc_tcga_pan_can_atlas_2018	TCGA-18-3407-01	72	Male	SQ	0.2785	0.4411	-0.654	-0.3625	0.1791	0.0833	WT	Asian
1192	lusc_tcga_pan_can_atlas_2018	TCGA-56-A5DS-01	72	Female	SQ	0.5513	0.3782	0.1403	0.0445	-1.0377	0.0304	WT	White
1351	lusc_tcga_pan_can_atlas_2018	TCGA-85-8353-01	72	Male	SQ	0.5672	-0.1033	1.6369	-0.387	-1.1919	0.0138	WT	White
383	luad_tcga_pan_can_atlas_2018	TCGA-97-8179-01	72	Male	Ad	-1.0096	-1.5722	-0.5201	-0.6447	-0.9076	-0.0204	WT	White
201	luad_tcga_pan_can_atlas_2018	TCGA-55-8619-01	72	Female	Ad	0.3207	0.279	-1.2425	-1.0909	-0.0626	-0.1282	WT	White
37	luad_tcga_pan_can_atlas_2018	TCGA-38-7271-01	72	Female	Ad	0.7371	0.2545	-0.9217	-0.3381	0.0543	-0.1383	WT	White
288	luad_tcga_pan_can_atlas_2018	TCGA-78-7154-01	72	Male	Ad	-0.9594	-1.4598	0.1142	0.8103	0.2999	-0.2616	WT	White
1307	lusc_tcga_pan_can_atlas_2018	TCGA-77-8131-01	72	Male	SQ	1.3044	2.5484	-0.1541	-1.2	0.303	-0.2633	WT
334	luad_tcga_pan_can_atlas_2018	TCGA-86-8671-01	72	Female	Ad	0.5231	1.5337	0.0273	-1.4966	0.2958	-0.2773	WT	White
379	luad_tcga_pan_can_atlas_2018	TCGA-97-7941-01	72	Female	Ad	-0.0454	-0.1515	-0.8864	-0.3014	0.3924	-0.3492	WT	White
81	luad_tcga_pan_can_atlas_2018	TCGA-49-4487-01	72	Female	Ad	-0.5938	0.0511	1.5912	1.6162	0.079	-0.4044	WT	White
1138	lusc_tcga_pan_can_atlas_2018	TCGA-43-8115-01	72	Female	SQ	0.514	0.2964	-0.1308	-1.6964	-0.4115	-0.4442	WT	White
1172	lusc_tcga_pan_can_atlas_2018	TCGA-56-8305-01	72	Male	SQ	-0.7676	-0.1673	-1.9499	1.051	-0.817	-0.4717	WT	White
419	luad_tcga_pan_can_atlas_2018	TCGA-MP-A4TI-01	72	Male	Ad	0.4131	1.5265	1.1027	-0.6036	0.1892	-0.5782	WT	White
64	luad_tcga_pan_can_atlas_2018	TCGA-44-7660-01	72	Male	Ad	-1.2517	-0.412	0.7515	2.59	-0.5393	-0.5973	WT	White
1118	lusc_tcga_pan_can_atlas_2018	TCGA-39-5035-01	72	Female	SQ	-0.3471	0.1496	-0.9878	-0.0562	0.2998	-0.6563	WT	White
300	luad_tcga_pan_can_atlas_2018	TCGA-78-7537-01	72	Male	Ad	-0.9237	-0.4347	-0.8719	-0.5227	0.1635	-0.7733	WT
390	luad_tcga_pan_can_atlas_2018	TCGA-99-8025-01	72	Female	Ad	-0.3439	0.6898	-0.5254	-0.6956	0.4421	-0.8055	WT	Black or African American
145	luad_tcga_pan_can_atlas_2018	TCGA-55-6972-01	72	Male	Ad	-3	-2.4458	-2.0783	2.1497	0.1563	-0.8385	WT	White
80	luad_tcga_pan_can_atlas_2018	TCGA-49-4486-01	72	Male	Ad	-1.3855	-0.9158	-0.7037	1.3949	1.7739	-1.3437	WT	White
106	luad_tcga_pan_can_atlas_2018	TCGA-50-5044-01	72	Female	Ad	-0.6938	1.6496	1.0293	0.0282	1.6216	-1.5707	WT	White
35	luad_tcga_pan_can_atlas_2018	TCGA-38-4631-01	72	Female	Ad	-1.9537	1.6989	1.8671	4.8461	2.307	-1.5926	WT	White
1050	lusc_tcga_pan_can_atlas_2018	TCGA-22-5481-01	72	Female	SQ	-1.623	0.3901	1.1439	0.8	2.2371	-4.0758	WT	White
470	luad_tcga_pan_can_atlas_2018	TCGA-69-7760-01	73	Male	Ad	1.6928	-2.6391	-0.733	1.1966	-1.4181	1.5658	MUT	White
469	luad_tcga_pan_can_atlas_2018	TCGA-67-6217-01	73	Female	Ad	1.4929	-0.4634	-2.4598	-0.959	-0.0846	1.2692	MUT	White
464	luad_tcga_pan_can_atlas_2018	TCGA-62-8402-01	73	Female	Ad	-0.6505	0.769	0.4538	-0.2188	-1.286	0.5489	MUT	White
1454	lusc_tcga_pan_can_atlas_2018	TCGA-56-8304-01	73	Female	SQ	-0.7442	0.385	1.2455	1.0324	0.8836	0.537	MUT	White
1448	lusc_tcga_pan_can_atlas_2018	TCGA-22-4601-01	73	Female	SQ	-0.7987	-1.0889	-0.2223	0.0781	-0.6841	-0.5433	MUT	White
1475	lusc_tcga_pan_can_atlas_2018	TCGA-60-2703-01	73	Male	SQ	1.256	-1.2984	0.4088	-0.2789	-0.4162	2.7504	WT	White
1474	lusc_tcga_pan_can_atlas_2018	TCGA-58-A46L-01	73	Male	SQ	-0.4708	-0.8218	-0.4269	1.3994	-1.2014	2.4817	WT	White
1468	lusc_tcga_pan_can_atlas_2018	TCGA-39-5027-01	73	Male	SQ	-1.4078	-1.5868	-0.1632	0.4878	1.551	2.118	WT	White
1205	lusc_tcga_pan_can_atlas_2018	TCGA-60-2704-01	73	Male	SQ	1.3521	-1.0659	-0.9444	-0.1383	-0.6305	1.0365	WT	White
186	luad_tcga_pan_can_atlas_2018	TCGA-55-8207-01	73	Male	Ad	0.8892	-0.2933	-1.4858	-1.2979	0.3689	0.9391	WT	White
1358	lusc_tcga_pan_can_atlas_2018	TCGA-85-8664-01	73	Male	SQ	-0.515	0.624	1.1452	-1.2092	2.5065	0.8415	WT	White
1038	lusc_tcga_pan_can_atlas_2018	TCGA-22-4599-01	73	Female	SQ	0.1149	-0.5323	0.8289	1.2498	1.8738	0.7629	WT	White
195	luad_tcga_pan_can_atlas_2018	TCGA-55-8511-01	73	Female	Ad	0.8236	0.887	1.0688	-0.6088	-0.8353	0.7154	WT	White
1030	lusc_tcga_pan_can_atlas_2018	TCGA-22-1011-01	73	Male	SQ	0.7135	-0.1956	-0.0948	-0.1351	-0.7512	0.6467	WT	White
1056	lusc_tcga_pan_can_atlas_2018	TCGA-22-5492-01	73	Female	SQ	1.7741	-0.3022	0.26	-0.3879	-0.4513	0.5213	WT
315	luad_tcga_pan_can_atlas_2018	TCGA-86-6851-01	73	Female	Ad	0.757	0.9437	0.0037	0.4054	-0.9003	0.4732	WT	White
1139	lusc_tcga_pan_can_atlas_2018	TCGA-43-8116-01	73	Male	SQ	0.2708	1.1389	0.0125	-0.3075	-0.785	0.4475	WT	White
1313	lusc_tcga_pan_can_atlas_2018	TCGA-77-8145-01	73	Male	SQ	0.1485	0.7767	-1.1622	-1.1781	0.7791	0.3555	WT
1334	lusc_tcga_pan_can_atlas_2018	TCGA-85-7699-01	73	Male	SQ	0.7773	0.6414	1.9188	-0.7728	0.9195	0.353	WT	White
1396	lusc_tcga_pan_can_atlas_2018	TCGA-96-7545-01	73	Male	SQ	0.746	-1.4212	-1.066	-1.2442	-2.0297	0.2401	WT	White
175	luad_tcga_pan_can_atlas_2018	TCGA-55-7995-01	73	Female	Ad	0.2203	0.7157	1.2566	1.4342	-0.7311	0.2011	WT	White
1216	lusc_tcga_pan_can_atlas_2018	TCGA-60-2721-01	73	Male	SQ	0.5212	0.6097	-0.8387	0.7016	0.3385	0.1515	WT	White
1275	lusc_tcga_pan_can_atlas_2018	TCGA-66-2789-01	73	Male	SQ	0.0528	-0.7866	0.7157	-0.4729	-0.0074	0.0984	WT
75	luad_tcga_pan_can_atlas_2018	TCGA-44-A479-01	73	Female	Ad	0.3919	1.0576	-0.4986	-0.6781	-0.5611	0.0701	WT	Black or African American
1148	lusc_tcga_pan_can_atlas_2018	TCGA-51-4079-01	73	Female	SQ	-0.021	0.623	-0.1418	0.4351	-0.202	0.0399	WT	Black or African American
78	luad_tcga_pan_can_atlas_2018	TCGA-44-A47G-01	73	Female	Ad	0.2318	1.6524	-0.2438	-0.9282	-0.2539	-0.1006	WT	White
1119	lusc_tcga_pan_can_atlas_2018	TCGA-39-5036-01	73	Male	SQ	-1.0023	-0.4673	0.2458	1.3974	-0.3259	-0.1349	WT	White
1386	lusc_tcga_pan_can_atlas_2018	TCGA-94-7033-01	73	Male	SQ	0.6484	1.0351	0.2373	1.796	1.0463	-0.1386	WT	White
1436	lusc_tcga_pan_can_atlas_2018	TCGA-NK-A5CX-01	73	Male	SQ	0.6416	0.9145	-0.6654	-0.5016	-0.1357	-0.1817	WT	White
1039	lusc_tcga_pan_can_atlas_2018	TCGA-22-4604-01	73	Male	SQ	0.2447	0.2858	1.4175	-0.9604	1.0211	-0.1896	WT	White
1006	lusc_tcga_pan_can_atlas_2018	TCGA-18-3414-01	73	Male	SQ	0.7968	0.0836	-0.7395	0.4983	0.2744	-0.2534	WT	Asian
1042	lusc_tcga_pan_can_atlas_2018	TCGA-22-4613-01	73	Female	SQ	-0.2833	-0.8879	-0.1885	1.4066	-0.8038	-0.2678	WT	White
1400	lusc_tcga_pan_can_atlas_2018	TCGA-98-7454-01	73	Male	SQ	1.5258	-0.72	-0.4844	-1.1098	-1.0475	-0.3216	WT	White
1426	lusc_tcga_pan_can_atlas_2018	TCGA-NC-A5HL-01	73	Male	SQ	-0.664	-0.9147	1.743	-0.9799	-1.2283	-0.3378	WT	White
1287	lusc_tcga_pan_can_atlas_2018	TCGA-68-A59I-01	73	Female	SQ	1.2451	0.0526	-0.6094	-1.8827	-0.4603	-0.3812	WT	Black or African American
1391	lusc_tcga_pan_can_atlas_2018	TCGA-94-8491-01	73	Male	SQ	-0.2676	-0.0539	0.0414	0.3435	0.2697	-0.4044	WT	White
1289	lusc_tcga_pan_can_atlas_2018	TCGA-6A-AB49-01	73	Female	SQ	1.2972	-1.9935	1.0626	-2.16	-1.1537	-0.4244	WT	Black or African American
1387	lusc_tcga_pan_can_atlas_2018	TCGA-94-7557-01	73	Male	SQ	-0.7581	-0.4698	-0.2325	0.3392	-0.7629	-0.4936	WT	Black or African American
79	luad_tcga_pan_can_atlas_2018	TCGA-44-A4SS-01	73	Male	Ad	-0.3996	0.452	0.0199	-0.3931	-1.0148	-0.5237	WT	White
1086	lusc_tcga_pan_can_atlas_2018	TCGA-34-5240-01	73	Female	SQ	-0.1291	-1.1255	2.3218	1.1695	1.4071	-0.5884	WT	White
1063	lusc_tcga_pan_can_atlas_2018	TCGA-33-4583-01	73	Male	SQ	-1.5419	-0.9729	-0.2158	1.0551	-1.8385	-0.8631	WT	White
1165	lusc_tcga_pan_can_atlas_2018	TCGA-56-7730-01	73	Male	SQ	-1.8891	-1.3425	1.1639	0.8254	0.5798	-0.9373	WT	White
1009	lusc_tcga_pan_can_atlas_2018	TCGA-18-3419-01	73	Male	SQ	-0.0652	1.1621	0.2198	0.3983	-0.2474	-1.0667	WT
187	luad_tcga_pan_can_atlas_2018	TCGA-55-8208-01	73	Female	Ad	0.1809	1.233	0.1739	0.9942	0.0097	-1.1215	WT	White
239	luad_tcga_pan_can_atlas_2018	TCGA-67-3774-01	73	Female	Ad	-0.074	0.1128	-0.0086	-0.0631	-0.2031	-1.1358	WT	White
73	luad_tcga_pan_can_atlas_2018	TCGA-44-8119-01	73	Male	Ad	0.4117	-0.4389	1.1224	-1.2788	-1.2347	-1.1903	WT	White
85	luad_tcga_pan_can_atlas_2018	TCGA-49-4507-01	73	Female	Ad	0.2089	2.1271	0.6881	1.1617	1.0336	-1.2519	WT	White
220	luad_tcga_pan_can_atlas_2018	TCGA-62-A46S-01	73	Male	Ad	-1.2705	-0.1153	-1.4393	-0.3655	-1.0282	-1.301	WT	White
1117	lusc_tcga_pan_can_atlas_2018	TCGA-39-5034-01	73	Female	SQ	-0.4108	-0.5741	-0.3616	-0.5314	0.7465	-1.84	WT	White
451	luad_tcga_pan_can_atlas_2018	TCGA-50-6595-01	74	Female	Ad	-0.1481	0.3492	0.8576	-0.3312	0.0529	1.7539	MUT	White
496	luad_tcga_pan_can_atlas_2018	TCGA-97-A4M7-01	74	Male	Ad	0.6464	0.3239	-0.1758	-0.9541	0.4519	1.0429	MUT	White
1481	lusc_tcga_pan_can_atlas_2018	TCGA-77-8133-01	74	Male	SQ	-0.3643	0.4794	-0.169	-0.0384	-0.8867	2.3692	WT
389	luad_tcga_pan_can_atlas_2018	TCGA-99-7458-01	74	Female	Ad	0.8773	0.2269	-0.6119	-0.0531	-1.1683	1.1791	WT	White
12	luad_tcga_pan_can_atlas_2018	TCGA-05-4405-01	74	Female	Ad	0.8814	0.3431	-0.8593	-0.4201	-0.4916	1.0176	WT
432	luad_tcga_pan_can_atlas_2018	TCGA-O1-A52J-01	74	Female	Ad	0.7287	-0.1275	-0.5595	-0.9876	-1.8018	1.012	WT	White
179	luad_tcga_pan_can_atlas_2018	TCGA-55-8091-01	74	Male	Ad	0.6835	1.8373	-0.4697	-0.6866	0.4169	0.7194	WT	White
393	luad_tcga_pan_can_atlas_2018	TCGA-99-8033-01	74	Female	Ad	0.5626	1.0185	0.803	0.9582	-1.6639	0.6167	WT	White
1292	lusc_tcga_pan_can_atlas_2018	TCGA-77-6844-01	74	Male	SQ	0.7136	-0.791	-0.5384	0.454	0.0422	0.5907	WT	White
1177	lusc_tcga_pan_can_atlas_2018	TCGA-56-8504-01	74	Male	SQ	-0.0514	-0.206	-1.4137	0.9188	-1.2309	0.5422	WT	White
1240	lusc_tcga_pan_can_atlas_2018	TCGA-63-A5MT-01	74	Male	SQ	0.4672	-0.0472	0.4093	-1.8129	0.1717	0.39	WT
41	luad_tcga_pan_can_atlas_2018	TCGA-44-2657-01	74	Female	Ad	0.0813	0.0426	0.285	-0.8809	0.845	0.3451	WT	White
82	luad_tcga_pan_can_atlas_2018	TCGA-49-4488-01	74	Female	Ad	-0.7882	-0.5783	0.0192	1.0729	1.5056	0.3368	WT	White
158	luad_tcga_pan_can_atlas_2018	TCGA-55-7284-01	74	Male	Ad	0.4569	-0.9228	-1.8105	-0.5815	-1.4411	0.3218	WT	White
1362	lusc_tcga_pan_can_atlas_2018	TCGA-85-A4JB-01	74	Male	SQ	-1.6852	0.3653	0.8952	-0.1206	0.7132	0.246	WT	White
1171	lusc_tcga_pan_can_atlas_2018	TCGA-56-8201-01	74	Male	SQ	1.0408	1.6054	-0.3362	-0.1387	-1.3964	0.2411	WT	White
1156	lusc_tcga_pan_can_atlas_2018	TCGA-56-5897-01	74	Male	SQ	0.7573	0.7671	-1.7887	0.194	-0.9941	0.2349	WT	White
1420	lusc_tcga_pan_can_atlas_2018	TCGA-NC-A5HF-01	74	Male	SQ	0.4578	-0.0097	-0.887	-0.6605	0.5553	0.2205	WT	White
236	luad_tcga_pan_can_atlas_2018	TCGA-64-5815-01	74	Male	Ad	0.4503	1.4605	-0.3611	0.0728	0.9511	0.1952	WT	White
1308	lusc_tcga_pan_can_atlas_2018	TCGA-77-8136-01	74	Female	SQ	1.1754	1.1804	0.4534	-0.0139	0.4655	0.1022	WT
1309	lusc_tcga_pan_can_atlas_2018	TCGA-77-8138-01	74	Male	SQ	1.1278	1.089	0.3341	-0.5699	1.6869	0.0653	WT
1220	lusc_tcga_pan_can_atlas_2018	TCGA-60-2725-01	74	Male	SQ	0.2243	1.4454	0.0973	0.1424	-0.7955	0.0614	WT	White
130	luad_tcga_pan_can_atlas_2018	TCGA-50-8460-01	74	Male	Ad	1.527	0.55	-0.0704	-0.7556	0.7134	0.0097	WT	White
1013	lusc_tcga_pan_can_atlas_2018	TCGA-18-4721-01	74	Male	SQ	0.0923	-1.0017	-0.7641	0.9669	0.4828	-0.0165	WT	White
112	luad_tcga_pan_can_atlas_2018	TCGA-50-5072-01	74	Male	Ad	-0.7851	0.3997	1.3401	1.7504	-1.1116	-0.0244	WT	White
153	luad_tcga_pan_can_atlas_2018	TCGA-55-6986-01	74	Female	Ad	1.0705	-1.6548	-0.4668	0.809	0.5283	-0.0364	WT	White
1218	lusc_tcga_pan_can_atlas_2018	TCGA-60-2723-01	74	Female	SQ	0.8747	0.0609	0.2516	1.1872	1.6626	-0.128	WT	White
1055	lusc_tcga_pan_can_atlas_2018	TCGA-22-5491-01	74	Male	SQ	-1.5146	-0.7201	0.1316	2.6059	0.2547	-0.1959	WT	White
47	luad_tcga_pan_can_atlas_2018	TCGA-44-3396-01	74	Female	Ad	0.5669	0.8418	0.3009	-0.7658	0.3002	-0.2031	WT	White
265	luad_tcga_pan_can_atlas_2018	TCGA-73-4677-01	74	Male	Ad	-0.3622	-0.2767	-1.5507	0.5905	-0.9626	-0.2176	WT	White
1385	lusc_tcga_pan_can_atlas_2018	TCGA-92-8065-01	74	Female	SQ	0.9132	-0.1277	-2.2819	0.5049	0.119	-0.3557	WT	White
369	luad_tcga_pan_can_atlas_2018	TCGA-95-A4VK-01	74	Female	Ad	-1.1697	1.1719	0.6641	-2.6992	1.9716	-0.4179	WT	White
1291	lusc_tcga_pan_can_atlas_2018	TCGA-77-6843-01	74	Male	SQ	-1.3993	-1.7369	-1.3416	0.3925	0.4832	-0.4536	WT	White
1284	lusc_tcga_pan_can_atlas_2018	TCGA-68-7757-01	74	Male	SQ	-0.157	0.173	-2.1895	-0.6808	0.6393	-0.4965	WT	White
1288	lusc_tcga_pan_can_atlas_2018	TCGA-68-A59J-01	74	Female	SQ	0.3528	2.2017	0.3102	-0.269	-0.6785	-0.5927	WT	White
136	luad_tcga_pan_can_atlas_2018	TCGA-55-1595-01	74	Female	Ad	0.3771	-0.2852	0.8725	-0.1125	-0.7606	-0.6045	WT	Asian
1151	lusc_tcga_pan_can_atlas_2018	TCGA-52-7809-01	74	Male	SQ	0.6264	-1.4174	1.1167	0.9806	-0.8237	-0.6295	WT	White
1045	lusc_tcga_pan_can_atlas_2018	TCGA-22-5474-01	74	Male	SQ	0.1244	0.3527	-1.1075	-1.6039	-0.4756	-0.7321	WT	White
1203	lusc_tcga_pan_can_atlas_2018	TCGA-60-2695-01	74	Female	SQ	-0.0114	-1.1755	1.5612	0.1745	0.1807	-1.477	WT	White
1368	lusc_tcga_pan_can_atlas_2018	TCGA-85-A510-01	74	Female	SQ	-0.7754	-0.9236	2.1385	0.0876	-0.3441	-2.4212	WT	White
1052	lusc_tcga_pan_can_atlas_2018	TCGA-22-5483-01	74	Male	SQ	0.0169	-0.5728	1.2366	-0.2361	-0.0919	-2.6657	WT	White
498	luad_tcga_pan_can_atlas_2018	TCGA-L9-A50W-01	75	Male	Ad	-0.3765	-0.5291	-0.826	-0.5534	0.8362	0.6835	MUT	Black or African American
490	luad_tcga_pan_can_atlas_2018	TCGA-97-8172-01	75	Female	Ad	0.3312	-0.524	-1.2624	-1.7091	0.1051	-0.0795	MUT	White
1472	lusc_tcga_pan_can_atlas_2018	TCGA-58-8386-01	75	Male	SQ	1.1663	0.8238	-1.1241	-0.5789	-1.4071	2.6243	WT
1432	lusc_tcga_pan_can_atlas_2018	TCGA-NC-A5HR-01	75	Female	SQ	-1.8032	-1.1278	0.0694	2.07	-1.7357	1.2245	WT	White
1085	lusc_tcga_pan_can_atlas_2018	TCGA-34-5239-01	75	Male	SQ	0.0435	0.7499	0.5533	-1.3736	-0.4046	0.7701	WT	White
115	luad_tcga_pan_can_atlas_2018	TCGA-50-5932-01	75	Male	Ad	-1.3344	-2.0165	-0.5375	-1.5271	0.2662	0.7609	WT	White
1167	lusc_tcga_pan_can_atlas_2018	TCGA-56-7822-01	75	Male	SQ	0.2767	1.7651	-1.2031	0.5562	-2.1261	0.6903	WT	Black or African American
1015	lusc_tcga_pan_can_atlas_2018	TCGA-21-1072-01	75	Male	SQ	-0.3558	-2.3292	-0.1206	0.3526	-1.1599	0.6882	WT	White
1440	lusc_tcga_pan_can_atlas_2018	TCGA-O2-A52V-01	75	Female	SQ	-0.0524	0.2457	-0.4762	-0.2577	0.4963	0.6441	WT	Black or African American
1301	lusc_tcga_pan_can_atlas_2018	TCGA-77-7463-01	75	Male	SQ	0.3238	-0.4235	0.5712	0.4427	-0.6781	0.5672	WT	White
1401	lusc_tcga_pan_can_atlas_2018	TCGA-98-8021-01	75	Female	SQ	-0.1637	-0.411	-0.8488	1.0276	-1.2312	0.5134	WT	White
301	luad_tcga_pan_can_atlas_2018	TCGA-78-7539-01	75	Female	Ad	-0.0767	0.4269	-1.13	-1.162	0.3119	0.4072	WT	White
245	luad_tcga_pan_can_atlas_2018	TCGA-69-7764-01	75	Male	Ad	-0.531	-1.1506	0.6363	-0.5773	1.0953	0.3013	WT	White
1113	lusc_tcga_pan_can_atlas_2018	TCGA-39-5028-01	75	Male	SQ	0.8627	1.5929	-2.1282	-0.0069	0.5139	0.2832	WT	White
1398	lusc_tcga_pan_can_atlas_2018	TCGA-96-8170-01	75	Female	SQ	1.0265	0.5956	-1.9656	0.2352	-0.2972	0.2764	WT	White
357	luad_tcga_pan_can_atlas_2018	TCGA-93-7348-01	75	Female	Ad	-0.0434	-0.2224	-0.8971	-0.2785	-0.1479	0.0829	WT	White
203	luad_tcga_pan_can_atlas_2018	TCGA-55-8621-01	75	Female	Ad	0.4952	0.8476	-0.6184	-1.1999	-0.1458	0.0448	WT	White
1318	lusc_tcga_pan_can_atlas_2018	TCGA-77-A5G1-01	75	Male	SQ	1.1559	0.8097	-1.6397	1.4322	1.6911	0.0369	WT
352	luad_tcga_pan_can_atlas_2018	TCGA-91-8497-01	75	Female	Ad	-0.1217	-0.0178	-1.7978	-2.2154	0.093	0.022	WT	White
1261	lusc_tcga_pan_can_atlas_2018	TCGA-66-2769-01	75	Male	SQ	0.3415	0.7795	0.0012	-1.7499	-0.2086	-0.0469	WT
293	luad_tcga_pan_can_atlas_2018	TCGA-78-7162-01	75	Male	Ad	0.0776	-0.7706	-0.4008	-0.8572	-0.5355	-0.1451	WT	White
1082	lusc_tcga_pan_can_atlas_2018	TCGA-34-5232-01	75	Female	SQ	-0.1346	1.1645	-0.2736	-0.0428	-0.1882	-0.1488	WT	Black or African American
114	luad_tcga_pan_can_atlas_2018	TCGA-50-5931-01	75	Female	Ad	-2.1325	-0.4551	1.7815	3.6969	1.1323	-0.3546	WT	White
412	luad_tcga_pan_can_atlas_2018	TCGA-MP-A4T7-01	75	Female	Ad	-0.6646	0.9773	0.5466	-0.3434	0.913	-0.4254	WT
1189	lusc_tcga_pan_can_atlas_2018	TCGA-56-A4ZJ-01	75	Female	SQ	0.9872	1.3578	-0.9489	-1.6559	-0.2661	-0.4703	WT	White
414	luad_tcga_pan_can_atlas_2018	TCGA-MP-A4TA-01	75	Female	Ad	-0.5059	1.8233	1.0138	1.0225	-0.0855	-0.4963	WT	White
329	luad_tcga_pan_can_atlas_2018	TCGA-86-8281-01	75	Male	Ad	-1.6962	-0.8154	-1.4127	0.729	-0.6922	-0.5464	WT	White
349	luad_tcga_pan_can_atlas_2018	TCGA-91-6849-01	75	Female	Ad	-0.3922	0.2551	-1.1792	-0.4797	0.5135	-0.6611	WT	Black or African American
1043	lusc_tcga_pan_can_atlas_2018	TCGA-22-5471-01	75	Male	SQ	-0.5788	1.4694	0.2424	0.1982	1.2027	-0.6893	WT	White
1041	lusc_tcga_pan_can_atlas_2018	TCGA-22-4607-01	75	Male	SQ	-0.1695	-1.1613	1.56	0.868	1.4297	-0.7515	WT	White
180	luad_tcga_pan_can_atlas_2018	TCGA-55-8092-01	75	Male	Ad	0.1368	0.4735	-0.4656	-0.2174	0.1743	-0.9641	WT	White
1137	lusc_tcga_pan_can_atlas_2018	TCGA-43-7658-01	75	Female	SQ	-0.7915	-0.8681	1.9899	0.7374	-0.974	-2.0203	WT	White
500	luad_tcga_pan_can_atlas_2018	TCGA-MP-A4T6-01	76	Female	Ad	-0.9327	0.5878	-1.0091	-1.1796	-0.4165	0.8491	MUT	White
1451	lusc_tcga_pan_can_atlas_2018	TCGA-43-A56U-01	76	Female	SQ	1.0376	0.8609	-1.0079	-1.8438	-0.0141	-0.3727	MUT	White
7	luad_tcga_pan_can_atlas_2018	TCGA-05-4395-01	76	Male	Ad	0.734	1.0668	-0.2837	0.6714	1.5629	1.4052	WT
1482	lusc_tcga_pan_can_atlas_2018	TCGA-77-8143-01	76	Male	SQ	-1.0299	0.3874	1.8903	0.0574	-0.728	1.2463	WT
1243	lusc_tcga_pan_can_atlas_2018	TCGA-63-A5MW-01	76	Male	SQ	0.6701	-1.6246	0.7705	-0.4318	0.2295	1.2232	WT
372	luad_tcga_pan_can_atlas_2018	TCGA-97-7546-01	76	Female	Ad	1.0123	-1.6916	-0.0263	-0.1794	-0.901	0.8739	WT	White
161	luad_tcga_pan_can_atlas_2018	TCGA-55-7724-01	76	Female	Ad	1.0086	-2.0765	0.2509	1.3877	-1.3304	0.8326	WT	White
132	luad_tcga_pan_can_atlas_2018	TCGA-53-7626-01	76	Female	Ad	1.0463	0.2531	-0.0826	0.2683	-0.073	0.7945	WT	White
157	luad_tcga_pan_can_atlas_2018	TCGA-55-7283-01	76	Female	Ad	0.2323	-0.4297	-0.9682	0.3103	-0.4533	0.7768	WT	White
198	luad_tcga_pan_can_atlas_2018	TCGA-55-8614-01	76	Male	Ad	-0.9553	0.0301	0.415	1.9019	2.1332	0.714	WT	White
378	luad_tcga_pan_can_atlas_2018	TCGA-97-7938-01	76	Female	Ad	1.5307	-1.9314	-1.1112	-0.0132	-0.412	0.6858	WT	White
1023	lusc_tcga_pan_can_atlas_2018	TCGA-21-5783-01	76	Male	SQ	0.2012	-0.962	-0.4362	-0.3675	-0.0494	0.6409	WT	White
428	luad_tcga_pan_can_atlas_2018	TCGA-NJ-A55A-01	76	Female	Ad	-0.0804	-0.4035	-0.756	-0.1962	0.2867	0.5986	WT	White
185	luad_tcga_pan_can_atlas_2018	TCGA-55-8205-01	76	Female	Ad	0.8923	1.181	0.7852	0.3337	-1.7301	0.4945	WT	White
356	luad_tcga_pan_can_atlas_2018	TCGA-93-7347-01	76	Female	Ad	0.2906	1.6732	-0.2398	-0.4491	0.5756	0.383	WT	White
1145	lusc_tcga_pan_can_atlas_2018	TCGA-46-3767-01	76	Male	SQ	1.0761	-0.7637	-0.967	-0.2468	-0.3246	0.3724	WT	White
1190	lusc_tcga_pan_can_atlas_2018	TCGA-56-A4ZK-01	76	Female	SQ	-0.444	0.9459	0.998	0.2344	-0.1124	0.3257	WT	White
1076	lusc_tcga_pan_can_atlas_2018	TCGA-34-2600-01	76	Female	SQ	-1.4192	-1.2731	-0.8978	2.6334	1.9127	0.2587	WT	White
8	luad_tcga_pan_can_atlas_2018	TCGA-05-4396-01	76	Male	Ad	0.0497	-0.5181	-1.3414	-0.1272	-1.9015	0.1796	WT
1116	lusc_tcga_pan_can_atlas_2018	TCGA-39-5031-01	76	Female	SQ	0.476	-0.0795	1.5651	0.9954	1.6126	0.1095	WT
1027	lusc_tcga_pan_can_atlas_2018	TCGA-22-1000-01	76	Male	SQ	1.1553	1.1993	-0.6946	-0.9039	0.1575	0.0138	WT	White
1427	lusc_tcga_pan_can_atlas_2018	TCGA-NC-A5HM-01	76	Male	SQ	1.0425	0.808	-0.0039	0.1569	0.6922	-0.3356	WT	White
1121	lusc_tcga_pan_can_atlas_2018	TCGA-39-5039-01	76	Male	SQ	1.5091	1.154	-1.487	-1.2072	2.1857	-0.3358	WT	White
1134	lusc_tcga_pan_can_atlas_2018	TCGA-43-6773-01	76	Male	SQ	0.0079	0.8348	-1.1132	0.2409	-0.6783	-0.3409	WT	White
1410	lusc_tcga_pan_can_atlas_2018	TCGA-98-A53H-01	76	Female	SQ	0.6199	0.204	-0.9827	-2.2582	-0.0536	-0.3849	WT	White
1176	lusc_tcga_pan_can_atlas_2018	TCGA-56-8503-01	76	Female	SQ	0.5487	1.1795	-0.4564	0.6088	-0.3864	-0.4046	WT	White
422	luad_tcga_pan_can_atlas_2018	TCGA-MP-A5C7-01	76	Female	Ad	-2.3599	-0.6863	-1.0168	-0.0658	-2.3891	-0.5462	WT	White
1059	lusc_tcga_pan_can_atlas_2018	TCGA-33-4533-01	76	Female	SQ	0.5154	-1.9536	0.7997	-2.018	0.3965	-0.6026	WT	Black or African American
11	luad_tcga_pan_can_atlas_2018	TCGA-05-4403-01	76	Male	Ad	0.6052	-0.2677	-0.2858	0.3883	-0.1063	-0.6873	WT
1111	lusc_tcga_pan_can_atlas_2018	TCGA-39-5022-01	76	Male	SQ	1.0239	0.9737	-0.3095	-0.0682	0.258	-1.1151	WT	White
166	luad_tcga_pan_can_atlas_2018	TCGA-55-7815-01	76	Male	Ad	0.7035	-3.4305	0.4738	-1.2854	-2.1754	-1.1279	WT
353	luad_tcga_pan_can_atlas_2018	TCGA-91-8499-01	76	Female	Ad	-1.5242	-1.2921	3.2404	1.9134	-0.1703	-3.7588	WT	White
446	luad_tcga_pan_can_atlas_2018	TCGA-49-4494-01	77	Male	Ad	0.8356	1.5111	0.9295	0.6298	1.5285	-0.4853	MUT	White
1464	lusc_tcga_pan_can_atlas_2018	TCGA-22-4593-01	77	Male	SQ	0.4749	-1.2488	0.8072	-0.4143	0.3894	2.7603	WT	White
1471	lusc_tcga_pan_can_atlas_2018	TCGA-56-6545-01	77	Female	SQ	0.7262	-0.0814	-0.9744	-1.2346	-0.4758	2.6034	WT	White
1462	lusc_tcga_pan_can_atlas_2018	TCGA-18-3408-01	77	Female	SQ	0.2565	-2.4296	-0.758	0.1687	-1.0263	1.5152	WT	White
1315	lusc_tcga_pan_can_atlas_2018	TCGA-77-8153-01	77	Female	SQ	-2.3562	-1.6181	1.4563	-0.3325	-1.1568	0.6181	WT
1428	lusc_tcga_pan_can_atlas_2018	TCGA-NC-A5HN-01	77	Male	SQ	-3.3717	0.6146	0.1341	0.8966	0.3387	0.5164	WT	White
1412	lusc_tcga_pan_can_atlas_2018	TCGA-98-A53J-01	77	Male	SQ	-0.2094	0.1092	-1.2307	1.1558	1.5154	0.3835	WT	White
397	luad_tcga_pan_can_atlas_2018	TCGA-J2-A4AE-01	77	Female	Ad	0.0467	-0.1393	0.728	-0.5351	-0.729	0.2791	WT	White
155	luad_tcga_pan_can_atlas_2018	TCGA-55-7227-01	77	Male	Ad	1.0174	-0.3071	-0.3525	-0.271	0.0902	0.0993	WT	White
415	luad_tcga_pan_can_atlas_2018	TCGA-MP-A4TC-01	77	Male	Ad	1.0341	1.0968	0.5204	-0.7789	1.3071	0.079	WT	White
1434	lusc_tcga_pan_can_atlas_2018	TCGA-NK-A5CR-01	77	Male	SQ	-2.2824	-1.1604	0.3589	-0.1332	-0.2088	0.076	WT
1443	lusc_tcga_pan_can_atlas_2018	TCGA-XC-AA0X-01	77	Female	SQ	0.2665	0.5892	-1.8258	-0.1477	-1.3843	0.0296	WT	Black or African American
307	luad_tcga_pan_can_atlas_2018	TCGA-78-8655-01	77	Female	Ad	1.4649	0.7124	-0.4922	-0.2198	0.1604	-0.0012	WT
197	luad_tcga_pan_can_atlas_2018	TCGA-55-8513-01	77	Female	Ad	0.6852	0.3948	-1.6522	-0.6985	-0.5305	-0.1528	WT	White
169	luad_tcga_pan_can_atlas_2018	TCGA-55-7907-01	77	Male	Ad	0.3464	-0.8029	0.4736	0.1487	1.1549	-0.3149	WT	White
1007	lusc_tcga_pan_can_atlas_2018	TCGA-18-3415-01	77	Male	SQ	0.1285	0.5719	-1.0692	0.1548	0.5903	-0.3496	WT
358	luad_tcga_pan_can_atlas_2018	TCGA-93-8067-01	77	Male	Ad	-1.3455	0.2072	0.4697	1.5017	-0.5899	-0.3594	WT	Asian
254	luad_tcga_pan_can_atlas_2018	TCGA-69-8453-01	77	Male	Ad	0.5922	0.6082	0.188	-0.6377	0.0334	-0.3713	WT	White
296	luad_tcga_pan_can_atlas_2018	TCGA-78-7167-01	77	Male	Ad	-1.065	-0.7934	-2.739	-0.2044	-0.8704	-0.4279	WT	White
1408	lusc_tcga_pan_can_atlas_2018	TCGA-98-A53C-01	77	Female	SQ	1.1182	-0.1778	-2.1836	-2.0917	-0.676	-0.633	WT	White
237	luad_tcga_pan_can_atlas_2018	TCGA-67-3771-01	77	Female	Ad	-0.4558	-0.3585	-0.2444	-0.802	0.6626	-0.7253	WT	Black or African American
48	luad_tcga_pan_can_atlas_2018	TCGA-44-3398-01	77	Female	Ad	1.0096	-0.3467	0.432	0.2446	1.37	-1.0927	WT	White
154	luad_tcga_pan_can_atlas_2018	TCGA-55-6987-01	77	Male	Ad	0.6273	0.7086	0.0165	-0.2209	-0.0686	-1.2119	WT	White
227	luad_tcga_pan_can_atlas_2018	TCGA-64-1677-01	77	Female	Ad	0.206	-1.4089	1.7137	0.795	0.7199	-1.2296	WT	White
492	luad_tcga_pan_can_atlas_2018	TCGA-97-8547-01	78	Female	Ad	-0.393	0.2863	-0.5122	-1.0468	-0.5252	0.9317	MUT
1489	lusc_tcga_pan_can_atlas_2018	TCGA-O2-A52N-01	78	Male	SQ	0.7621	1.3292	-1.1192	0.8425	-0.7797	2.3918	WT	White
206	luad_tcga_pan_can_atlas_2018	TCGA-55-A490-01	78	Male	Ad	-0.8903	-0.5534	0.7699	0.1654	0.3675	1.6655	WT	White
1465	lusc_tcga_pan_can_atlas_2018	TCGA-22-5473-01	78	Male	SQ	-0.3523	0.2702	0.3831	-0.2289	1.2797	1.0401	WT	White
1193	lusc_tcga_pan_can_atlas_2018	TCGA-56-A62T-01	78	Male	SQ	-0.104	-0.3383	-2.2645	1.0926	-0.7806	0.9208	WT	Black or African American
1239	lusc_tcga_pan_can_atlas_2018	TCGA-63-A5MS-01	78	Male	SQ	0.5429	0.5164	-1.0941	-1.5937	0.6342	0.64	WT
1399	lusc_tcga_pan_can_atlas_2018	TCGA-96-A4JL-01	78	Female	SQ	-0.1517	1.2549	0.6759	-0.7481	-1.3585	0.5275	WT	Asian
221	luad_tcga_pan_can_atlas_2018	TCGA-62-A46V-01	78	Female	Ad	0.7527	0.3589	0.4713	0.1042	-0.3739	0.283	WT	White
343	luad_tcga_pan_can_atlas_2018	TCGA-91-6829-01	78	Male	Ad	0.6211	-1.497	0.6552	0.1451	-1.4384	0.126	WT	White
1040	lusc_tcga_pan_can_atlas_2018	TCGA-22-4605-01	78	Female	SQ	0.3293	0.4357	-1.6709	-0.1649	0.4254	0.048	WT
1183	lusc_tcga_pan_can_atlas_2018	TCGA-56-8628-01	78	Male	SQ	0.2749	0.4304	-0.9527	-0.7944	-0.2868	-0.0414	WT	White
76	luad_tcga_pan_can_atlas_2018	TCGA-44-A47A-01	78	Female	Ad	-0.2898	1.1358	0.7316	-0.4949	1.097	-0.1718	WT	White
338	luad_tcga_pan_can_atlas_2018	TCGA-86-A456-01	78	Female	Ad	0.8097	1.2684	-0.7801	-1.0251	-1.0652	-0.1828	WT	Asian
1286	lusc_tcga_pan_can_atlas_2018	TCGA-68-8251-01	78	Male	SQ	-0.7446	0.0359	0.5159	1.7852	-0.5927	-0.2023	WT	White
1090	lusc_tcga_pan_can_atlas_2018	TCGA-34-5929-01	78	Female	SQ	-0.4736	-0.1469	1.4497	1.0284	0.604	-0.2115	WT	White
1128	lusc_tcga_pan_can_atlas_2018	TCGA-43-5668-01	78	Male	SQ	0.5278	-0.1068	1.1331	-1.4177	1.4416	-0.5943	WT	White
1236	lusc_tcga_pan_can_atlas_2018	TCGA-63-A5MN-01	78	Female	SQ	1.6801	0.5325	-0.6238	-2.1022	-0.8206	-0.6373	WT
355	luad_tcga_pan_can_atlas_2018	TCGA-91-A4BD-01	78	Male	Ad	0.8801	1.2484	-0.8021	0.4197	1.8078	-0.8109	WT	White
479	luad_tcga_pan_can_atlas_2018	TCGA-86-8055-01	79	Male	Ad	0.7076	-0.1521	0.3037	-0.3761	0.0833	2.088	MUT	White
1290	lusc_tcga_pan_can_atlas_2018	TCGA-77-6842-01	79	Male	SQ	0.1465	1.3014	0.5182	-0.9192	-0.5497	0.6285	WT	White
1159	lusc_tcga_pan_can_atlas_2018	TCGA-56-7221-01	79	Male	SQ	-0.864	0.0025	-1.2446	1.3843	-0.896	0.6275	WT	White
149	luad_tcga_pan_can_atlas_2018	TCGA-55-6982-01	79	Female	Ad	0.3485	1.1485	0.6059	-0.932	-0.4649	0.5806	WT	White
1174	lusc_tcga_pan_can_atlas_2018	TCGA-56-8308-01	79	Male	SQ	-1.1324	0.4	-1.4996	-0.881	1.5826	0.4652	WT	White
1418	lusc_tcga_pan_can_atlas_2018	TCGA-NC-A5HD-01	79	Male	SQ	-3.1737	-1.079	0.2743	0.1807	-0.3202	0.3188	WT	White
1047	lusc_tcga_pan_can_atlas_2018	TCGA-22-5478-01	79	Male	SQ	0.6219	0.0391	-0.5945	-1.2508	0.0206	0.3052	WT
126	luad_tcga_pan_can_atlas_2018	TCGA-50-6597-01	79	Female	Ad	-1.0506	-0.4318	-2.1532	-1.2346	-0.379	0.0364	WT	White
3	luad_tcga_pan_can_atlas_2018	TCGA-05-4250-01	79	Female	Ad	0.6042	0.5897	0.3533	0.9849	2.4019	-0.1804	WT
1262	lusc_tcga_pan_can_atlas_2018	TCGA-66-2770-01	79	Male	SQ	0.0818	0.9687	0.2276	0.8015	-0.1143	-0.1916	WT
125	luad_tcga_pan_can_atlas_2018	TCGA-50-6594-01	79	Female	Ad	-0.3811	0.8595	0.8793	1.8877	-0.2912	-0.3111	WT	Black or African American
1087	lusc_tcga_pan_can_atlas_2018	TCGA-34-5241-01	79	Male	SQ	0.8126	1.1804	0.3792	-0.1155	0.4581	-0.5937	WT	White
77	luad_tcga_pan_can_atlas_2018	TCGA-44-A47B-01	79	Male	Ad	0.3712	1.3933	0.4257	-0.2242	1.0318	-0.9337	WT	White
88	luad_tcga_pan_can_atlas_2018	TCGA-49-4514-01	79	Female	Ad	-1.8733	0.0919	0.5576	1.0399	-0.84	-1.0755	WT	White
110	luad_tcga_pan_can_atlas_2018	TCGA-50-5055-01	79	Female	Ad	0.052	0.2278	-0.3812	-0.4781	0.8937	-1.5805	WT	White
462	luad_tcga_pan_can_atlas_2018	TCGA-55-A57B-01	80	Female	Ad	0.8479	-1.268	-0.8831	-1.0638	-0.006	1.85	MUT	Black or African American
213	luad_tcga_pan_can_atlas_2018	TCGA-62-8395-01	80	Female	Ad	-0.6714	0.5429	-1.099	-0.122	-2.1094	0.5946	WT	White
178	luad_tcga_pan_can_atlas_2018	TCGA-55-8090-01	80	Male	Ad	0.7415	1.5261	0.5689	-0.7308	0.8557	0.5632	WT	White
257	luad_tcga_pan_can_atlas_2018	TCGA-73-4658-01	80	Female	Ad	0.3694	0.4236	-0.0252	-0.2321	0.4725	0.3344	WT	White
1169	lusc_tcga_pan_can_atlas_2018	TCGA-56-8082-01	80	Female	SQ	0.1726	-0.9001	0.3002	0.4532	-1.9282	0.2698	WT	White
1095	lusc_tcga_pan_can_atlas_2018	TCGA-34-A5IX-01	80	Male	SQ	0.9121	1.5107	0.3347	0.9843	0.2036	0.2537	WT	White
1034	lusc_tcga_pan_can_atlas_2018	TCGA-22-4591-01	80	Male	SQ	0.4603	-1.6556	0.6629	-0.0182	0.9961	0.2108	WT	White
1031	lusc_tcga_pan_can_atlas_2018	TCGA-22-1012-01	80	Female	SQ	-1.0467	0.6953	-0.268	0.8261	0.7461	0.0891	WT	White
1024	lusc_tcga_pan_can_atlas_2018	TCGA-21-5784-01	80	Female	SQ	0.6137	1.7637	-0.9865	-0.2122	0.1666	-0.4043	WT	White
1066	lusc_tcga_pan_can_atlas_2018	TCGA-33-6738-01	80	Male	SQ	-1.7078	-1.1304	-0.0296	0.3739	1.0027	-0.5348	WT	White
1388	lusc_tcga_pan_can_atlas_2018	TCGA-94-7943-01	80	Male	SQ	-1.0479	-1.4886	-1.2961	0.9375	0.4955	-0.9418	WT	White
38	luad_tcga_pan_can_atlas_2018	TCGA-38-A44F-01	80	Male	Ad	0.5081	1.5687	-0.2495	-0.8179	0.4757	-1.0949	WT	White
485	luad_tcga_pan_can_atlas_2018	TCGA-91-6835-01	81	Female	Ad	1.1363	-0.1102	0.3692	0.5171	0.6793	0.9318	MUT	White
489	luad_tcga_pan_can_atlas_2018	TCGA-97-8171-01	81	Male	Ad	-0.3905	-2.5108	0.2587	1.0289	-1.1678	0.7652	MUT	Asian
1449	lusc_tcga_pan_can_atlas_2018	TCGA-22-4609-01	81	Male	SQ	1.2188	0.1925	-0.7472	0.1558	-0.339	0.7213	MUT	White
174	luad_tcga_pan_can_atlas_2018	TCGA-55-7994-01	81	Male	Ad	2.2862	0.2594	1.2091	0.2586	-1.1071	1.0607	WT	White
384	luad_tcga_pan_can_atlas_2018	TCGA-97-A4LX-01	81	Male	Ad	0.8202	1.1531	-0.0963	0.5731	-0.8842	0.6666	WT	White
1115	lusc_tcga_pan_can_atlas_2018	TCGA-39-5030-01	81	Female	SQ	0.3797	0.926	0.5056	-0.2635	-0.5401	0.5347	WT	Asian
1051	lusc_tcga_pan_can_atlas_2018	TCGA-22-5482-01	81	Male	SQ	-0.2053	0.3301	-0.8045	-0.6473	-0.5997	0.4159	WT	White
1325	lusc_tcga_pan_can_atlas_2018	TCGA-77-A5GH-01	81	Male	SQ	-0.497	0.7533	-0.4485	0.5174	-0.9663	0.2156	WT
147	luad_tcga_pan_can_atlas_2018	TCGA-55-6978-01	81	Male	Ad	0.4871	1.2773	1.2693	0.0832	-0.9887	0.2084	WT	White
90	luad_tcga_pan_can_atlas_2018	TCGA-49-6743-01	81	Female	Ad	0.5606	1.3097	0.8574	1.2877	0.4945	0.1471	WT	White
1191	lusc_tcga_pan_can_atlas_2018	TCGA-56-A5DR-01	81	Male	SQ	0.0262	0.5944	0.7417	0.3404	0.5867	0.0925	WT	White
207	luad_tcga_pan_can_atlas_2018	TCGA-55-A491-01	81	Female	Ad	-0.1398	0.346	0.4144	0.8984	-0.7787	-0.2438	WT	White
267	luad_tcga_pan_can_atlas_2018	TCGA-73-7499-01	81	Female	Ad	0.7147	0.4049	0.6874	2.528	0.0076	-0.4119	WT	White
1003	lusc_tcga_pan_can_atlas_2018	TCGA-18-3410-01	81	Male	SQ	-0.1663	1.3324	0.8283	-0.4165	1.6798	-0.4636	WT
150	luad_tcga_pan_can_atlas_2018	TCGA-55-6983-01	81	Male	Ad	-0.6964	-0.033	-0.2799	-0.5183	0.6425	-0.7349	WT	White
1147	lusc_tcga_pan_can_atlas_2018	TCGA-46-6026-01	81	Male	SQ	-1.8539	-2.0495	0.7312	0.5814	-0.0914	-1.287	WT	White
468	luad_tcga_pan_can_atlas_2018	TCGA-67-3772-01	82	Female	Ad	0.2065	-0.7248	-0.594	-0.8123	0.3952	-0.0191	MUT	White
92	luad_tcga_pan_can_atlas_2018	TCGA-49-6745-01	82	Male	Ad	0.6279	-0.6364	0.7458	0.601	-0.9455	0.6501	WT	White
23	luad_tcga_pan_can_atlas_2018	TCGA-05-4433-01	82	Male	Ad	0.1469	-0.4126	-0.5745	-0.1895	-1.9777	-0.1465	WT
376	luad_tcga_pan_can_atlas_2018	TCGA-97-7554-01	83	Female	Ad	0.054	-0.4649	0.5436	-0.6465	-0.2592	1.2984	WT	White
1089	lusc_tcga_pan_can_atlas_2018	TCGA-34-5928-01	83	Female	SQ	0.8145	-0.4873	-1.3486	-0.6845	-0.0495	0.7422	WT	White
1164	lusc_tcga_pan_can_atlas_2018	TCGA-56-7582-01	83	Male	SQ	-0.5389	-0.5299	0.3428	-0.1197	-0.1499	0.7215	WT	White
1071	lusc_tcga_pan_can_atlas_2018	TCGA-33-AASD-01	83	Male	SQ	-0.8573	-0.2911	-0.0206	1.3701	0.1917	0.3731	WT	Black or African American
1395	lusc_tcga_pan_can_atlas_2018	TCGA-96-7544-01	83	Male	SQ	0.4473	-0.6575	0.0685	0.1697	-0.5416	0.2841	WT	White
1214	lusc_tcga_pan_can_atlas_2018	TCGA-60-2719-01	83	Female	SQ	-0.5118	-0.1403	0.8078	0.0281	-1.0767	-0.1894	WT	White
1008	lusc_tcga_pan_can_atlas_2018	TCGA-18-3416-01	83	Male	SQ	0.3591	0.9076	0.9607	-2.6577	-1.8697	-0.4002	WT
388	luad_tcga_pan_can_atlas_2018	TCGA-97-A4M5-01	83	Male	Ad	-0.4414	0.5249	-0.9653	-1.1132	0.4426	-0.4523	WT	White
452	luad_tcga_pan_can_atlas_2018	TCGA-50-6673-01	84	Female	Ad	-0.3639	-0.9668	-0.1691	-0.7916	0.2172	2.116	MUT	White
1180	lusc_tcga_pan_can_atlas_2018	TCGA-56-8624-01	84	Male	SQ	0.1103	-0.2023	-2.2121	-0.2347	0.4082	0.7174	WT	White
1079	lusc_tcga_pan_can_atlas_2018	TCGA-34-2608-01	84	Male	SQ	0.6941	0.3831	-1.539	-0.0563	0.5558	0.0392	WT	White
1283	lusc_tcga_pan_can_atlas_2018	TCGA-68-7756-01	84	Male	SQ	0.706	0.3162	-0.5302	0.0806	0.7511	-0.044	WT	White
1163	lusc_tcga_pan_can_atlas_2018	TCGA-56-7580-01	84	Male	SQ	0.6928	-0.9874	0.891	1.7195	0.8629	-0.14	WT	White
238	luad_tcga_pan_can_atlas_2018	TCGA-67-3773-01	84	Female	Ad	1.4041	-0.3319	-0.7828	-0.3338	1.1238	-0.3152	WT	White
1363	lusc_tcga_pan_can_atlas_2018	TCGA-85-A4JC-01	84	Male	SQ	0.0874	1.5467	-1.412	0.9592	-0.0937	-0.3337	WT	White
243	luad_tcga_pan_can_atlas_2018	TCGA-69-7761-01	84	Male	Ad	0.9941	1.2255	-0.1296	-1.057	-1.5389	-0.3528	WT	White
223	luad_tcga_pan_can_atlas_2018	TCGA-62-A470-01	84	Male	Ad	-0.7261	0.5624	-0.5408	-1.1321	-2.0844	-0.9731	WT	White
295	luad_tcga_pan_can_atlas_2018	TCGA-78-7166-01	84	Male	Ad	-1.4969	1.0482	0.215	0.3168	1.4556	-1.5612	WT	White
505	luad_tcga_pan_can_atlas_2018	TCGA-50-5939-01	85	Male	Ad	0.8469	0.4467	0.2605	0.1311	-0.2641	2.9818	WT	White
1133	lusc_tcga_pan_can_atlas_2018	TCGA-43-6771-01	85	Male	SQ	0.4591	1.4308	-0.186	-0.4128	2.5707	1.1065	WT	White
60	luad_tcga_pan_can_atlas_2018	TCGA-44-6777-01	85	Female	Ad	1.217	0.6215	-0.382	-0.5908	0.3784	0.9972	WT	White
252	luad_tcga_pan_can_atlas_2018	TCGA-69-8254-01	85	Male	Ad	0.9206	-0.4938	-0.0111	0.0501	-0.2889	0.2926	WT	White
117	luad_tcga_pan_can_atlas_2018	TCGA-50-5935-01	86	Female	Ad	0.2902	-0.6417	-0.6574	0.0509	-0.4987	0.433	WT	White
184	luad_tcga_pan_can_atlas_2018	TCGA-55-8204-01	87	Female	Ad	-0.1936	0.9563	0.2246	1.1865	0.7508	0.4459	WT	White
425	luad_tcga_pan_can_atlas_2018	TCGA-NJ-A4YI-01	87	Female	Ad	1.3491	0.2869	-0.6706	0.3977	1.1335	0.3752	WT	White
211	luad_tcga_pan_can_atlas_2018	TCGA-55-A4DF-01	88	Male	Ad	0.1335	-0.0977	1.977	-1.2904	-0.8972	-1.3793	WT	White
1323	lusc_tcga_pan_can_atlas_2018	TCGA-77-A5GB-01	90	Male	SQ	0.2799	1.3523	0.8668	1.1931	-0.6435	0.4107	WT
